# Supplementary material for: Genomic characterization of four novel bacteriophages infecting the clinical pathogen Klebsiella pneumoniae
Source: bioRxiv or medRxiv preprint supplement (doi:10.1101/2021.03.02.433402), 2021-03-02
Supplement: Supplementary file [file media-1.pdf]

## Supplementary data

Genomic characterization of four novel bacteriophages infecting the clinical pathogen *Klebsiella pneumoniae*

Boris Estrada Bonilla, Ana Rita Costa, Teunke van Rossum, Stefan Hagedoorn, Hielke Walinga, Minfeng Xiao, Wenchen Song, Pieter-Jan Haas, Franklin L. Nobrega, Stan J. J. Brouns

### Content

**Supplementary Table S1.** List of protein homologs to the tubulin spindle protein of phage 201phi2-1 found by psi-Blast and Hmmer search and used to build the tubulin spindle phylogenetic tree.

**Supplementary Table S2.** List of protein homologs to the nucleus shell protein of phage 201phi2-1 found by psi-Blast and Hmmer search and used to build the nucleus shell phylogenetic tree.

**Supplementary Table S3.** Genome annotations of *Klebsiella pneumoniae* phage vB\_KpP\_FBKp16.

**Supplementary Table S4.** Genome annotations of *Klebsiella pneumoniae* phage vB\_KpP\_FBKp27.

**Supplementary Table S5.** Genome annotations of *Klebsiella pneumoniae* phage vB\_KpM\_FBKp34.

**Supplementary Table S6.** Genome annotations of *Klebsiella pneumoniae* phage vB\_KpM\_FBKp24.

**Supplementary Table S7.** Analysis of codon usage of phages vB\_KpP\_FBKp27, vB\_KpM\_FBKp34, vB\_KpM\_FBKp24 and *Klebsiella pneumoniae* HS11286 using Cusp from EMBOSS.

**Supplementary Table S1.** List of protein homologs to the tubulin spindle protein of phage 201phi2-1 found by psi-Blast and Hmmer search and used to build the tubulin spindle phylogenetic tree.

| Phage                                      | Genome size | psi-Blast    |         |              | Hmmer    | Protein accession number | Ref |
|--------------------------------------------|-------------|--------------|---------|--------------|----------|--------------------------|-----|
|                                            |             | Coverage (%) | E-value | Identity (%) | E value  |                          |     |
| <i>Aeromonas</i> phage CF8                 | 238,150     | 100          | 5.0E-55 | 24.46        | -        | QDB70454.1               | -   |
| <i>Aeromonas</i> phage D3                  | 262,372     | 98           | 6.0E-50 | 18.61        | -        | QDJ97033.1               | -   |
| <i>Aeromonas</i> phage D6                  | 259,831     | 98           | 5.0E-49 | 18.93        | -        | QDJ97195.1               | -   |
| <i>Aeromonas</i> phage D9                  | 260,857     | 98           | 6.0E-50 | 18.61        | -        | QEP52339.1               | -   |
| <i>Aeromonas</i> phage LAh10               | 260,310     | 98           | 5.0E-49 | 18.93        | -        | QDH47086.1               | -   |
| <i>Aeromonas</i> phage PS1                 | 237,367     | 99           | 1.0E-47 | 20.56        | -        | QDJ96797.1               | -   |
| <i>Bacillus</i> virus G                    | 497,513     | 94           | 7.0E-53 | 12.28        | -        | YP_009015441.1           | -   |
| <i>Clostridium</i> phage c-st              | 185,683     | 95           | 4.0E-65 | 15.00        | -        | 4XCQ_A                   | -   |
| <i>Edwardsiella</i> phage pEt-SU           | 276,734     | 99           | 2.0E-58 | 25.39        | 3.0E-18  | YP_009822177.1           | -   |
| <i>Erwinia</i> phage Ea35-70               | 271,084     | 100          | 3.0E-56 | 23.46        | 1.0E-21  | YP_009005002.1           | -   |
| <i>Erwinia</i> phage PhiEaH1               | 218,339     | 98           | 7.0E-49 | 23.84        | 2.6E-15  | YP_009010087.1           | -   |
| <i>Erwinia</i> phage vB_EamM_Deimos-Minion | 273,501     | -            | -       | -            | 1.0E-21  | ANH52315                 | -   |
| <i>Erwinia</i> phage vB_EamM_Joad          | 235,374     | -            | -       | -            | 1.2E-06  | ASU03898                 | -   |
| <i>Erwinia</i> phage vB_EamM_RisingSun     | 235,108     | 99           | 2.0E-48 | 16.92        | -        | YP_009612761.1           | -   |
| <i>Erwinia</i> phage vB_EamM_Special G     | 273,224     | -            | -       | -            | 1.0E-21  | ANJ65024                 | -   |
| <i>Escherichia</i> phage vB_EcoM_Goslar    | 237,307     | 99           | 2.0E-55 | 22.77        | 1.3E-12  | YP_009820885.1           | -   |
| <i>Halocynthia</i> phage JM-2012           | 167,292     | 99           | 2.0E-43 | 20.81        | 6.3E-09  | YP_006383382.1           | -   |
| <i>Klebsiella</i> phage Miami              | 253,383     | 98           | 2.0E-44 | 18.81        | -        | QPB09366.1               | -   |
| <i>Klebsiella</i> phage N1M2               | 253,367     | 99           | 8.0E-60 | 21.81        | -        | QGH71890.1               | -   |
| <i>Photobacterium</i> phage PDCC-1         | 237,509     | 98           | 6.0E-52 | 19.44        | -        | YP_009853560.1           | -   |
| <i>Proteus</i> phage 10                    | 223,209     | 100          | 6.0E-61 | 25.00        | -        | QMP24134.1               | -   |
| <i>Pseudomonas</i> phage 201phi2-1         | 316,674     | 99           | 8.0E-57 | 100.00       | 5.1E-208 | 3J5V_a                   | 1   |
| <i>Pseudomonas</i> phage EL                | 211,215     | 91           | 3.0E-45 | 16.72        | -        | YP_418049.1              | -   |
| <i>Pseudomonas</i> phage fnug              | 278,899     | 99           | 3.0E-63 | 29.85        | -        | QJB22689.1               | -   |
| <i>Pseudomonas</i> phage KTN4              | 279,593     | 99           | 2.0E-63 | 29.85        | -        | ANM44810.1               | -   |
| <i>Pseudomonas</i> phage Noxifer           | 278,136     | 99           | 4.0E-46 | 26.93        | 1.9E-26  | YP_009608946.1           | -   |
| <i>Pseudomonas</i> phage OBP               | 284,757     | 99           | 3.0E-49 | 22.12        | 2.0E-14  | YP_004957954.1           | -   |
| <i>Pseudomonas</i> phage PA02              | 279,095     | 99           | 2.0E-64 | 30.46        | -        | BBI55877.1               | -   |
| <i>Pseudomonas</i> phage PA1C              | 304,671     | 99           | 2.0E-76 | 48.73        | 7.1E-88  | QBX32179.1               | -   |
| <i>Pseudomonas</i> phage Phabio            | 309,157     | 99           | 6.0E-52 | 29.84        | 2.7E-39  | ARV76677.1               | -   |
| <i>Pseudomonas</i> phage PhiPA3            | 309,208     | 99           | 6.0E-73 | 45.86        | 2.0E-86  | YP_009217111.1           | 1   |

|                                          |         |     |         |       |         |                |              |
|------------------------------------------|---------|-----|---------|-------|---------|----------------|--------------|
| <i>Pseudomonas</i> phage Psa21           | 305,260 | 99  | 8.0E-54 | 31.95 | 1.5E-46 | QBJ02557.1     | -            |
| <i>Pseudomonas</i> phage SL2             | 279,696 | 99  | 3.0E-63 | 29.85 | -       | YP_009619864.1 | -            |
| <i>Pseudomonas</i> virus phiKZ           | 278,899 | 99  | 2.0E-63 | 29.85 | 2.8E-44 | 3ZBP_A         | <sup>1</sup> |
| <i>Ralstonia</i> phage RP12              | 279,845 | 96  | 3.0E-51 | 19.62 | 2.0E-09 | YP_009598707.1 | -            |
| <i>Ralstonia</i> phage RP31              | 276,958 | 96  | 2.0E-51 | 19.94 | 1.9E-09 | BAW19276.1     | -            |
| <i>Ralstonia</i> phage RSF1              | 222,888 | 91  | 5.0E-48 | 20.76 | 1.3E-12 | YP_009207815.1 | -            |
| <i>Ralstonia</i> phage RSL2              | 223,932 | 91  | 9.0E-51 | 22.15 | 1.1E-13 | BAQ02539.2     | -            |
| <i>Salmonella</i> phage<br>vB_SalM_SA002 | 288,012 | 100 | 9.0E-59 | 24.54 | -       | QKE54534.1     | -            |
| <i>Serratia</i> phage 2050HW             | 276,025 | 99  | 2.0E-56 | 22.50 | 1.6E-16 | YP_009833975.1 | <sup>2</sup> |
| <i>Serratia</i> phage PCH45              | 212,807 | 90  | 2.0E-51 | 18.47 | -       | QFP93107.1     | -            |
| <i>Vibrio</i> phage 2 TSL-2019           | 242,446 | 98  | 2.0E-51 | 19.44 | -       | YP_009843109.1 | -            |
| <i>Vibrio</i> phage Aphrodite1           | 237,722 | 98  | 8.0E-54 | 21.25 | 3.5E-13 | YP_009622183.1 | -            |
| <i>Vibrio</i> phage BONAISHI             | 288,967 | 98  | 2.0E-49 | 20.24 | 1.7E-11 | AXH70800.1     | -            |

**Supplementary Table S2.** List of protein homologs to the nucleus shell protein of phage 201phi2-1 found by psi-Blast and Hmmer search and used to build the nucleus shell phylogenetic tree.

| Phage                                      | Genome size | psi-Blast    |          |              | Hmmer E value | Protein accession number | Ref |
|--------------------------------------------|-------------|--------------|----------|--------------|---------------|--------------------------|-----|
|                                            |             | Coverage (%) | E-value  | Identity (%) |               |                          |     |
| <i>Aeromonas</i> phage CF8                 | 238,150     | 97           | 5.0E-77  | 14.01        | -             | QDB70465.1               | -   |
| <i>Aeromonas</i> phage D3                  | 262,372     | 96           | 6.0E-90  | 13.73        | -             | QDJ97041.1               | -   |
| <i>Aeromonas</i> phage LAh10               | 260,310     | 96           | 1.0E-89  | 13.27        | -             | QDH47031.1               | -   |
| <i>Aeromonas</i> phage PS1                 | 237,367     | 93           | 3.0E-94  | 13.90        | -             | QDJ96807.1               | -   |
| <i>Cronobacter</i> phage CR5               | 223,989     | 95           | 2.0E-96  | 13.76        | -             | YP_008125763.1           | -   |
| <i>Edwardsiella</i> phage pEt-SU           | 276,734     | 92           | 2.0E-96  | 13.29        | -             | YP_009821902.1           | -   |
| <i>Erwinia</i> phage Ea35-70               | 271,084     | 96           | 1.0E-116 | 20.79        | 3.6E-12       | YP_009005014.1           | -   |
| <i>Erwinia</i> phage PhiEaH1               | 218,339     | 98           | 7.0E-91  | 16.25        | -             | YP_009010075.1           | -   |
| <i>Erwinia</i> phage phiEaH2               | 243,050     | 90           | 5.0E-115 | 12.48        | -             | YP_007237854.1           | -   |
| <i>Erwinia</i> phage vB_EamM_Asesino       | 246,290     | 99           | 7.0E-117 | 11.85        | -             | YP_009290657.1           | -   |
| <i>Erwinia</i> phage vB_EamM_Caitlin       | 241,147     | 90           | 3.0E-104 | 12.88        | -             | YP_009292105.1           | -   |
| <i>Erwinia</i> phage vB_EamM_ChrisDB       | 244,840     | 89           | 4.0E-103 | 13.14        | -             | YP_009292727.1           | -   |
| <i>Erwinia</i> phage vB_EamM_Deimos-Minion | 273,501     | -            | -        | -            | 3.6E-12       | ANH52327                 | -   |
| <i>Erwinia</i> phage vB_EamM_EarlPhillipIV | 223,935     | 95           | 8.0E-96  | 13.85        | -             | YP_009278336.1           | -   |
| <i>Erwinia</i> phage vB_EamM_Huxley        | 240,761     | 96           | 5.0E-105 | 11.73        | -             | YP_009293007.1           | -   |
| <i>Erwinia</i> phage vB_EamM_Kwan          | 246,390     | 90           | 2.0E-91  | 12.01        | -             | YP_009278639.1           | -   |
| <i>Erwinia</i> phage vB_EamM_Phobos        | 229,501     | 95           | 3.0E-94  | 13.76        | -             | YP_009283513.1           | -   |
| <i>Erwinia</i> phage vB_EamM_RisingSun     | 235,108     | 94           | 7.0E-76  | 12.98        | -             | YP_009612772.1           | -   |
| <i>Erwinia</i> phage vB_EamM_Simmy50       | 271,088     | 93           | 5.0E-116 | 21.39        | -             | YP_009606010.1           | -   |
| <i>Erwinia</i> phage vB_EamM_Special G     | 273,224     | -            | -        | -            | 3.6E-12       | ANJ65036                 | -   |
| <i>Escherichia</i> phage vB_EcoM_Goslar    | 237,307     | 100          | 2.0E-131 | 18.18        | 2.8E-07       | YP_009820873.1           | -   |
| <i>Halocynthia</i> phage JM-2012           | 167,292     | 94           | 4.0E-55  | 14.77        | -             | YP_006383413.1           | -   |
| <i>Klebsiella</i> phage Miami              | 253,383     | 95           | 5.0E-80  | 15.76        | -             | QPB09376.1               | -   |
| <i>Klebsiella</i> phage N1M2               | 253,367     | 92           | 7.0E-95  | 15.24        | -             | QGH71899.1               | -   |
| <i>Photobacterium</i> phage PDCC-          | 237,509     | 99           | 5.0E-91  | 15.06        | -             | YP_009853356.1           | -   |

|                                             |         |     |          |        |          |                |              |
|---------------------------------------------|---------|-----|----------|--------|----------|----------------|--------------|
| <i>Proteus</i> phage 10                     | 223,209 | 97  | 3.0E-113 | 20.60  | -        | QMP24145.1     | -            |
| <i>Pseudomonas</i> phage 201phi2-1          | 316,674 | 100 | 2.0E-175 | 100.00 | 0.0E+00  | YP_001956829.1 | <sup>1</sup> |
| <i>Pseudomonas</i> phage EL                 | 211,215 | 97  | 2.0E-68  | 11.11  | -        | YP_418056.1    | -            |
| <i>Pseudomonas</i> phage KTN4               | 279,593 | 100 | 2.0E-146 | 39.59  | -        | ANM44831.1     | -            |
| <i>Pseudomonas</i> phage Noxifer            | 278,136 | 96  | 3.0E-142 | 35.90  | 1.7E-111 | YP_009608965.1 | -            |
| <i>Pseudomonas</i> phage OBP                | 284,757 | 93  | 4.0E-102 | 14.38  | -        | YP_004957964.1 | -            |
| <i>Pseudomonas</i> phage PA02               | 279,095 | 100 | 2.0E-145 | 39.59  | -        | BBI55859.1     | -            |
| <i>Pseudomonas</i> phage PA1C               | 304,671 | 100 | 1.0E-164 | 51.35  | 1.1E-201 | QBX32206.1     | -            |
| <i>Pseudomonas</i> phage PA7                | 266,743 | 100 | 2.0E-145 | 39.44  | -        | YP_009617618.1 | -            |
| <i>Pseudomonas</i> phage Phabio             | 309,157 | 100 | 1.0E-156 | 52.52  | 7.8E-206 | ARV76713.1     | -            |
| <i>Pseudomonas</i> phage PhiPA3             | 309,208 | 95  | 5.0E-172 | 51.41  | 6.2E-196 | YP_009217136.1 | <sup>1</sup> |
| <i>Pseudomonas</i> phage Psa21              | 305,260 | 100 | 3.0E-139 | 41.13  | 4.8E-144 | QBJ02586.1     | -            |
| <i>Pseudomonas</i> phage SL2                | 279,696 | 100 | 3.0E-145 | 39.28  | -        | YP_009619844.1 | -            |
| <i>Pseudomonas</i> phage<br>vB_PaeM_kmuB    | 266,592 | 100 | 1.0E-146 | 39.59  | -        | QOV07924.1     | -            |
| <i>Pseudomonas</i> phage<br>vB_PaeM_PS119XW | 301,543 | 100 | 2.0E-166 | 51.35  | -        | QEM41783.1     | -            |
| <i>Pseudomonas</i> virus phiKZ              | 278,899 | 100 | 5.0E-146 | 39.75  | 2.1E-133 | NP_803620.1    | <sup>1</sup> |
| <i>Ralstonia</i> phage RP12                 | 279,845 | 99  | 1.0E-95  | 18.88  | 8.1E-15  | YP_009598981.1 | -            |
| <i>Ralstonia</i> phage RP31                 | 276,958 | 99  | 5.0E-93  | 18.82  | 5.2E-15  | BAW19549.1     | -            |
| <i>Ralstonia</i> phage RSF1                 | 222,888 | 97  | 2.0E-118 | 17.67  | 6.9E-07  | YP_009208033.2 | -            |
| <i>Ralstonia</i> phage RSL2                 | 223,932 | 97  | 9.0E-117 | 17.80  | 1.5E-07  | YP_009213072.1 | -            |
| <i>Salmonella</i> phage pSal-<br>SNUABM-04  | 239,626 | 94  | 2.0E-103 | 11.49  | -        | QOC54489.1     | -            |
| <i>Salmonella</i> phage STsAS               | 197,215 | 99  | 2.0E-108 | 13.64  | -        | AWN08967.1     | -            |
| <i>Salmonella</i> phage<br>vB_SalM_SA002    | 288,012 | 95  | 6.0E-120 | 20.29  | -        | QKE54546.1     | -            |
| <i>Serratia</i> phage 2050HW                | 276,025 | 37  | 1.0E-21  | 14.57  | -        | YP_009833990.1 | <sup>2</sup> |
| <i>Serratia</i> phage Moabite               | 273,933 | 90  | 6.0E-84  | 16.47  | -        | YP_009849136.1 | -            |
| <i>Serratia</i> phage PCH45                 | 212,807 | 95  | 6.0E-85  | 13.94  | -        | QFP93061.1     | -            |
| <i>Vibrio</i> phage 2 TSL-2019              | 242,446 | 99  | 7.0E-90  | 15.06  | -        | YP_009843316.1 | -            |
| <i>Vibrio</i> phage Aphrodite1              | 237,722 | 99  | 2.0E-87  | 15.21  | -        | YP_009622192.1 | -            |
| <i>Vibrio</i> phage BONAISHI                | 288,967 | 99  | 3.0E-88  | 14.85  | -        | AXH70812.1     | -            |
| <i>Vibrio</i> phage pTD1                    | 239,276 | 94  | 8.0E-92  | 14.93  | -        | YP_009599417.1 | -            |
| <i>Vibrio</i> phage pVa-21                  | 231,998 | 93  | 4.0E-82  | 13.79  | -        | AQT28149.1     | -            |
| <i>Vibrio</i> phage USC-1                   | 238,099 | 99  | 2.0E-87  | 15.21  | -        | YP_009847864.1 | -            |
| <i>Vibrio</i> phage vB_pir03                | 286,284 | 98  | 2.0E-70  | 15.85  | -        | QNI21050.1     | -            |
| <i>Vibrio</i> phage vB_VmeM-Yong<br>XC31    | 290,532 | 97  | 2.0E-78  | 15.24  | -        | QAX96061.1     | -            |
| <i>Vibrio</i> phage VP4B                    | 236,053 | 99  | 5.0E-96  | 16.01  | -        | YP_009626053.1 | -            |
| <i>Xanthomonas</i> phage Xoo-sp14           | 232,104 | 99  | 1.0E-105 | 19.82  | -        | QNR51901.1     | -            |

**Supplementary Table S3.** Genome annotations of *Klebsiella pneumoniae* phage vB\_KpP\_FBKp16.

| <b>Locus_tag</b> | <b>Direction</b> | <b>Min</b> | <b>Max</b> | <b>Product</b>                    | <b>Notes</b>                                                                             | <b>Function</b> |
|------------------|------------------|------------|------------|-----------------------------------|------------------------------------------------------------------------------------------|-----------------|
| gp001            | +                | 13         | 729        | hypothetical protein              |                                                                                          |                 |
| gp002            | +                | 739        | 1,086      | peptidase                         | contains peptidase M15 domain                                                            | cell lysis      |
| gp003            | +                | 1,079      | 1,201      | hypothetical protein              |                                                                                          |                 |
| gp004            | +                | 1,198      | 1,344      | hypothetical protein              |                                                                                          |                 |
| gp005            | +                | 1,413      | 1,628      | hypothetical protein              |                                                                                          |                 |
| gp006            | +                | 1,949      | 3,694      | hypothetical protein              |                                                                                          |                 |
| gp007            | +                | 5,005      | 5,205      | hypothetical protein              |                                                                                          |                 |
| gp008            | -                | 5,479      | 5,709      | hypothetical protein              |                                                                                          |                 |
| gp009            | +                | 5,774      | 5,968      | hypothetical protein              |                                                                                          |                 |
| gp010            | +                | 6,023      | 6,541      | hypothetical protein              |                                                                                          |                 |
| gp011            | +                | 6,737      | 7,642      | hypothetical protein              |                                                                                          |                 |
| gp012            | +                | 7,711      | 10,344     | phage DNA-directed RNA polymerase | contains DNA-directed RNA polymerase N-terminal and DNA-dependent RNA polymerase domains | transcription   |
| gp013            | +                | 10,594     | 10,770     | hypothetical protein              |                                                                                          |                 |
| gp014            | +                | 10,773     | 12,776     | DNA primase/helicase              | DnaB-like helicase C terminal domain                                                     | DNA replication |
| gp015            | +                | 12,840     | 13,535     | hypothetical protein              |                                                                                          |                 |
| gp016            | +                | 13,532     | 13,759     | hypothetical protein              |                                                                                          |                 |
| gp017            | +                | 13,752     | 13,964     | hypothetical protein              |                                                                                          |                 |
| gp018            | +                | 14,030     | 14,125     | hypothetical protein              |                                                                                          |                 |
| gp019            | +                | 14,109     | 16,655     | phage DNA-directed DNA polymerase | contains DNA polymerase family A domain                                                  | DNA replication |
| gp020            | +                | 16,666     | 16,887     | hypothetical protein              |                                                                                          |                 |
| gp021            | +                | 17,026     | 17,832     | hypothetical protein              |                                                                                          |                 |
| gp022            | +                | 17,832     | 18,047     | hypothetical protein              |                                                                                          |                 |
| gp023            | +                | 18,345     | 18,716     | hypothetical protein              |                                                                                          |                 |

| Locus_tag | Direction | Min    | Max    | Product                                                                                    | Notes                                                         | Function                   |
|-----------|-----------|--------|--------|--------------------------------------------------------------------------------------------|---------------------------------------------------------------|----------------------------|
| gp024     | +         | 18,796 | 19,242 | hypothetical protein                                                                       |                                                               |                            |
| gp025     | +         | 19,310 | 19,633 | hypothetical protein                                                                       |                                                               |                            |
| gp026     | +         | 19,615 | 20,550 | phage exonuclease                                                                          |                                                               | DNA replication            |
| gp027     | +         | 20,535 | 20,936 | endonuclease                                                                               | contains recombination endonuclease VII domain                | DNA repair                 |
| gp028     | +         | 20,937 | 21,944 | phage phosphoesterase                                                                      |                                                               |                            |
| gp029     | +         | 22,061 | 22,468 | hypothetical protein                                                                       |                                                               |                            |
| gp030     | +         | 22,465 | 22,668 | hypothetical protein                                                                       |                                                               |                            |
| gp031     | +         | 22,665 | 23,618 | phage-associated ATP-dependent DNA ligase                                                  | contains DNA ligase OB-like domain                            | DNA replication and repair |
| gp032     | +         | 23,611 | 23,796 | hypothetical protein                                                                       |                                                               |                            |
| gp033     | +         | 23,783 | 24,211 | HNH endonuclease                                                                           |                                                               | DNA metabolism             |
| gp034     | +         | 24,238 | 24,387 | hypothetical protein                                                                       |                                                               |                            |
| gp035     | +         | 24,384 | 24,845 | putative N-acetyltransferase                                                               | contains acetyltransferase (GNAT) family domain               |                            |
| gp036     | +         | 24,854 | 25,060 | hypothetical protein                                                                       |                                                               |                            |
| gp037     | +         | 25,062 | 26,630 | phage collar, head-to-tail connector protein                                               | contains bacteriophage head to tail connecting protein domain | structural components      |
| gp038     | +         | 26,630 | 27,481 | phage capsid assembly scaffolding protein                                                  |                                                               | structural components      |
| gp039     | +         | 27,557 | 28,648 | major capsid protein                                                                       |                                                               | structural components      |
| gp040     | +         | 28,800 | 29,525 | phage non-contractile tail tubular protein A                                               | contains tail tubular protein domain                          | structural components      |
| gp041     | +         | 29,525 | 31,909 | phage non-contractile tail tubular protein B                                               |                                                               | structural components      |
| gp042     | +         | 31,909 | 32,577 | internal virion protein                                                                    |                                                               | structural components      |
| gp043     | +         | 32,578 | 35,514 | hypothetical protein                                                                       |                                                               |                            |
| gp044     | +         | 35,584 | 39,396 | phage DNA ejectosome component Gp16, peptidoglycan lytic exotransglycosylase (EC 4.2.2.n1) |                                                               | structural components      |

| <b>Locus_tag</b> | <b>Direction</b> | <b>Min</b> | <b>Max</b> | <b>Product</b>                 | <b>Notes</b>                                                                                        | <b>Function</b>       |
|------------------|------------------|------------|------------|--------------------------------|-----------------------------------------------------------------------------------------------------|-----------------------|
| gp045            | +                | 39,396     | 40,382     | tail fiber                     | contains phage T7 tail fibre protein domain; coiledstalk of trimeric autotransporter adhesin domain | structural components |
| gp046            | +                | 40,391     | 40,579     | holin                          | contains phage holin T7 family, holin superfamily II domain                                         | cell lysis            |
| gp047            | +                | 40,569     | 40,868     | phage terminase, small subunit |                                                                                                     | DNA packaging         |
| gp048            | +                | 40,868     | 42,766     | phage terminase large subunit  |                                                                                                     |                       |
| gp049            | +                | 42,917     | 43,183     | hypothetical protein           |                                                                                                     |                       |
| gp050            | +                | 43,197     | 43,463     | hypothetical protein           |                                                                                                     |                       |
| gp051            | +                | 43,474     | 44,010     | hypothetical protein           | possible neck whiskers protein                                                                      |                       |



**Supplementary Table S4.** Genome annotations of *Klebsiella pneumoniae* phage vB\_KpP\_FBKp27.

| Locus_tag | Direction | Min    | Max    | Product                                                       | Notes                                        | Function              | Cluster |
|-----------|-----------|--------|--------|---------------------------------------------------------------|----------------------------------------------|-----------------------|---------|
| gp001     | -         | 46     | 744    | hypothetical protein                                          | putative tail protein                        | structural components | F       |
| gp002     | +         | 834    | 1,595  | thymidylate synthase thyX                                     |                                              | DNA metabolism        | A       |
| gp003     | +         | 1,683  | 2,747  | ribonucleotide reductase, small subunit                       |                                              | DNA metabolism        | A       |
| gp004     | +         | 2,750  | 4,480  | ribonucleotide reductase of class Ia (aerobic), alpha subunit |                                              | DNA metabolism        | A       |
| gp005     | +         | 4,538  | 5,017  | hypothetical protein                                          |                                              |                       | A       |
| gp006     | +         | 4,995  | 5,969  | hypothetical protein                                          |                                              |                       | A       |
| gp007     | +         | 5,978  | 8,137  | hypothetical protein                                          | DNA primase                                  |                       | A       |
| gp008     | +         | 8,207  | 8,938  | hypothetical protein                                          | AAA-domain protein                           |                       | A       |
| gp009     | +         | 8,935  | 9,465  | putative HNH endonuclease                                     |                                              | DNA metabolism        | A       |
| gp010     | +         | 9,467  | 10,207 | hypothetical protein                                          | putative single-stranded DNA-binding protein |                       | A       |
| gp011     | +         | 10,250 | 10,573 | hypothetical protein                                          |                                              |                       | A       |
| gp012     | +         | 10,536 | 11,099 | hypothetical protein                                          |                                              |                       | A       |
| gp013     | +         | 11,102 | 11,782 | hypothetical protein                                          |                                              |                       | A       |
| gp014     | +         | 11,793 | 11,966 | hypothetical protein                                          |                                              |                       | A       |
| gp015     | -         | 12,002 | 22,642 | RNA polymerase                                                |                                              | transcription         | B       |
| gp016     | -         | 22,687 | 23,745 | hypothetical protein                                          |                                              |                       | B       |
| gp017     | -         | 23,749 | 24,174 | hypothetical protein                                          |                                              |                       | B       |
| gp018     | -         | 24,183 | 26,897 | hypothetical protein                                          |                                              |                       | B       |
| gp019     | -         | 26,954 | 27,772 | hypothetical protein                                          |                                              |                       | B       |
| gp020     | -         | 27,782 | 28,324 | hypothetical protein                                          |                                              |                       | B       |
| gp021     | -         | 28,408 | 29,580 | major capsid protein                                          |                                              | structural components | B       |
| gp022     | -         | 29,595 | 30,755 | putative tail tape measure protein                            |                                              | structural components | B       |
| gp023     | -         | 30,759 | 31,073 | hypothetical protein                                          |                                              |                       | B       |

| <b>Locus_tag</b> | <b>Direction</b> | <b>Min</b> | <b>Max</b> | <b>Product</b>                                        | <b>Notes</b> | <b>Function</b>       | <b>Cluster</b> |
|------------------|------------------|------------|------------|-------------------------------------------------------|--------------|-----------------------|----------------|
| gp024            | -                | 31,143     | 33,404     | portal protein                                        |              | structural components | B              |
| gp025            | +                | 33,461     | 34,075     | putative nucleoside triphosphate pyrophosphohydrolase |              | regulation            | C              |
| tRNA             | +                | 34,455     | 34,529     | tRNA-Asn-GTT                                          |              |                       | C              |
| tRNA             | +                | 34,535     | 34,609     | tRNA-Asp-GTC                                          |              |                       | C              |
| tRNA             | +                | 34,617     | 34,693     | tRNA-Pro-TGG                                          |              |                       | C              |
| tRNA             | +                | 34,699     | 34,785     | tRNA-Tyr-GTA                                          |              |                       | C              |
| tRNA             | +                | 34,792     | 34,881     | tRNA-Ser-TGA                                          |              |                       | C              |
| tRNA             | +                | 34,955     | 35,031     | tRNA-Gln-TTG                                          |              |                       | C              |
| gp026            | +                | 35,311     | 35,622     | hypothetical protein                                  |              |                       | C              |
| gp027            | +                | 35,619     | 36,038     | hypothetical protein                                  |              |                       | C              |
| gp028            | -                | 36,068     | 36,949     | hypothetical protein                                  |              |                       | D              |
| gp029            | -                | 36,959     | 38,563     | terminase large subunit                               |              | DNA packaging         | D              |
| gp030            | -                | 38,665     | 39,360     | hypothetical protein                                  |              |                       | D              |
| gp031            | +                | 39,445     | 39,840     | hypothetical protein                                  |              |                       | D              |
| gp032            | -                | 39,873     | 40,067     | hypothetical protein                                  |              |                       | D              |
| gp033            | +                | 40,591     | 40,818     | hypothetical protein                                  |              |                       | E              |
| gp034            | +                | 41,445     | 41,588     | hypothetical protein                                  |              |                       | E              |
| gp035            | +                | 41,596     | 41,748     | hypothetical protein                                  |              |                       | E              |
| gp036            | +                | 41,752     | 41,943     | hypothetical protein                                  |              |                       | E              |
| gp037            | +                | 41,959     | 42,222     | hypothetical protein                                  |              |                       | E              |
| gp038            | +                | 42,264     | 42,536     | hypothetical protein                                  |              |                       | E              |
| gp039            | +                | 42,816     | 43,019     | hypothetical protein                                  |              |                       | E              |
| gp040            | +                | 43,006     | 43,245     | hypothetical protein                                  |              |                       | E              |
| gp041            | +                | 43,666     | 44,007     | hypothetical protein                                  |              |                       | E              |
| gp042            | +                | 44,007     | 44,135     | hypothetical protein                                  |              |                       | E              |

| Locus_tag | Direction | Min    | Max    | Product                      | Notes | Function       | Cluster |
|-----------|-----------|--------|--------|------------------------------|-------|----------------|---------|
| gp043     | +         | 44,137 | 44,391 | hypothetical protein         |       |                | E       |
| gp044     | +         | 44,378 | 44,671 | hypothetical protein         |       |                | E       |
| gp045     | +         | 44,668 | 44,928 | hypothetical protein         |       |                | E       |
| gp046     | +         | 45,011 | 45,301 | hypothetical protein         |       |                | E       |
| gp047     | +         | 45,350 | 45,661 | hypothetical protein         |       |                | E       |
| gp048     | +         | 45,651 | 45,929 | hypothetical protein         |       |                | E       |
| gp049     | +         | 45,929 | 46,936 | RNA polymerase small subunit |       | transcription  | E       |
| gp050     | +         | 46,954 | 47,187 | hypothetical protein         |       |                | E       |
| gp051     | +         | 47,177 | 48,451 | RNA polymerase large subunit |       | transcription  | E       |
| gp052     | +         | 48,438 | 48,572 | hypothetical protein         |       |                | E       |
| gp053     | +         | 48,618 | 48,839 | hypothetical protein         |       |                | E       |
| gp054     | +         | 48,830 | 49,078 | hypothetical protein         |       |                | E       |
| gp055     | +         | 49,084 | 49,473 | hypothetical protein         |       |                | E       |
| gp056     | +         | 49,525 | 49,809 | hypothetical protein         |       |                | E       |
| gp057     | +         | 50,361 | 50,609 | hypothetical protein         |       |                | E       |
| gp058     | +         | 50,602 | 50,763 | hypothetical protein         |       |                | E       |
| gp059     | +         | 50,738 | 51,400 | hypothetical protein         |       |                | E       |
| gp060     | +         | 51,421 | 51,591 | hypothetical protein         |       |                | E       |
| gp061     | +         | 51,588 | 52,130 | hypothetical protein         |       |                | E       |
| gp062     | +         | 52,114 | 52,302 | hypothetical protein         |       |                | E       |
| gp063     | +         | 52,265 | 52,630 | putative HNH endonuclease    |       | DNA metabolism | E       |
| gp064     | +         | 52,627 | 52,959 | hypothetical protein         |       |                | E       |
| gp065     | +         | 52,943 | 53,128 | hypothetical protein         |       |                | E       |
| gp066     | +         | 53,125 | 53,298 | hypothetical protein         |       |                | E       |
| gp067     | +         | 53,355 | 53,552 | hypothetical protein         |       |                | E       |

| Locus_tag | Direction | Min    | Max    | Product                                      | Notes                       | Function              | Cluster |
|-----------|-----------|--------|--------|----------------------------------------------|-----------------------------|-----------------------|---------|
| gp068     | +         | 53,555 | 54,226 | hypothetical protein                         |                             |                       | E       |
| gp069     | +         | 54,236 | 54,475 | hypothetical protein                         |                             |                       | E       |
| gp070     | +         | 54,477 | 55,529 | putative ATPase                              |                             | DNA replication       | E       |
| gp071     | +         | 55,539 | 56,720 | hypothetical protein                         |                             |                       | E       |
| gp072     | +         | 56,859 | 58,142 | DNA helicase                                 |                             | DNA replication       | E       |
| gp073     | +         | 58,139 | 58,660 | hypothetical protein                         |                             |                       | E       |
| gp074     | +         | 58,657 | 59,031 | hypothetical protein                         |                             |                       | E       |
| gp075     | +         | 59,031 | 59,399 | hypothetical protein                         |                             |                       | E       |
| gp076     | +         | 59,356 | 59,535 | hypothetical protein                         |                             |                       | E       |
| gp077     | +         | 59,606 | 62,083 | RIIA-like protein                            |                             | DNA replication       | E       |
| gp078     | +         | 62,080 | 63,930 | RIIB-like protein                            |                             | DNA replication       | E       |
| gp079     | +         | 63,983 | 66,607 | DNA polymerase I                             |                             | DNA replication       | E       |
| gp080     | +         | 66,600 | 67,100 | hypothetical protein                         | putative avirulence protein |                       | E       |
| gp081     | +         | 67,094 | 67,468 | hypothetical protein                         |                             |                       | E       |
| gp082     | +         | 67,513 | 67,836 | hypothetical protein                         |                             |                       | E       |
| gp083     | +         | 67,877 | 68,215 | hypothetical protein                         |                             |                       | E       |
| gp084     | +         | 68,232 | 69,131 | methyl-directed repair DNA adenine methylase |                             | DNA repair            | E       |
| gp085     | +         | 69,128 | 69,358 | hypothetical protein                         |                             |                       | E       |
| gp086     | -         | 69,583 | 70,026 | putative tail protein                        |                             | structural components | F       |
| gp087     | -         | 70,103 | 70,612 | endopeptidase Rz                             |                             | cell lysis            | F       |
| gp088     | -         | 70,593 | 70,814 | hypothetical protein                         | possible holin              |                       | F       |
| gp089     | -         | 70,811 | 71,299 | lysozyme                                     |                             | cell lysis            | F       |
| gp090     | -         | 71,339 | 71,533 | hypothetical protein                         |                             |                       | F       |
| gp091     | -         | 71,537 | 73,384 | tail fiber family protein                    |                             | structural components | F       |
| gp092     | -         | 73,455 | 73,742 | hypothetical protein                         |                             |                       | F       |

| <b>Locus_tag</b> | <b>Direction</b> | <b>Min</b> | <b>Max</b> | <b>Product</b>     | <b>Notes</b>                                                                                                                | <b>Function</b>       | <b>Cluster</b> |
|------------------|------------------|------------|------------|--------------------|-----------------------------------------------------------------------------------------------------------------------------|-----------------------|----------------|
| gp093            | -                | 73,754     | 76,339     | tail spike protein | contains tail spike TSP1/Gp66 receptor binding<br>N-terminal domain domain, and pectate lyase<br>superfamily protein domain | structural components | F              |

**Supplementary Table S5.** Genome annotations of *Klebsiella pneumoniae* phage vB\_KpM\_FBKp34.

| <b>Locus_tag</b> | <b>Direction</b> | <b>Min</b> | <b>Max</b> | <b>Product</b>                                 | <b>Notes</b>                                                  | <b>Function</b>   | <b>Cluster</b> |
|------------------|------------------|------------|------------|------------------------------------------------|---------------------------------------------------------------|-------------------|----------------|
| gp001            | +                | 44         | 238        | hypothetical protein                           |                                                               |                   | D              |
| gp002            | +                | 344        | 1,012      | putative recombinase, resolvase family protein | contains resolvase, N terminal domain; similar to Phi92_gp052 | DNA recombination | D              |
| gp003            | +                | 1,020      | 1,232      | hypothetical protein                           |                                                               |                   | D              |
| gp004            | +                | 1,309      | 1,554      | hypothetical protein                           |                                                               |                   | D              |
| gp005            | +                | 1,616      | 1,948      | hypothetical protein                           | contains domain of unknown function DUF4326                   |                   | D              |
| gp006            | +                | 1,948      | 2,232      | hypothetical protein                           |                                                               |                   | D              |
| gp007            | +                | 2,225      | 2,470      | hypothetical protein                           |                                                               |                   | D              |
| gp008            | +                | 2,470      | 2,718      | hypothetical protein                           | contains domain of unknown function DUF4236                   |                   | D              |
| gp009            | +                | 2,727      | 2,819      | hypothetical protein                           |                                                               |                   | D              |
| gp010            | +                | 2,932      | 3,402      | hypothetical protein                           |                                                               |                   | D              |
| gp011            | +                | 3,406      | 3,729      | hypothetical protein                           |                                                               |                   | D              |
| gp012            | +                | 3,726      | 4,265      | hypothetical protein                           | contains domain of unknown function DUF1768                   |                   | D              |
| gp013            | +                | 4,279      | 4,458      | hypothetical protein                           |                                                               |                   | D              |
| gp014            | +                | 4,593      | 4,805      | hypothetical protein                           |                                                               |                   | D              |
| gp015            | +                | 4,802      | 5,152      | hypothetical protein                           |                                                               |                   | D              |
| gp016            | +                | 5,149      | 5,370      | hypothetical protein                           |                                                               |                   | D              |
| gp017            | +                | 5,398      | 5,973      | hypothetical protein                           |                                                               |                   | D              |
| gp018            | +                | 5,966      | 6,415      | hypothetical protein                           |                                                               |                   | D              |
| gp019            | +                | 6,408      | 6,695      | hypothetical protein                           |                                                               |                   | D              |
| gp020            | +                | 6,685      | 7,011      | hypothetical protein                           |                                                               |                   | D              |
| gp021            | +                | 6,998      | 7,525      | hypothetical protein                           |                                                               |                   | D              |
| gp022            | +                | 7,522      | 7,764      | hypothetical protein                           |                                                               |                   | D              |
| gp023            | +                | 7,773      | 8,141      | hypothetical protein                           |                                                               |                   | D              |

| Locus_tag | Direction | Min    | Max    | Product              | Notes                                               | Function | Cluster |
|-----------|-----------|--------|--------|----------------------|-----------------------------------------------------|----------|---------|
| gp024     | +         | 8,143  | 8,370  | hypothetical protein |                                                     |          | D       |
| gp025     | +         | 8,376  | 8,687  | hypothetical protein |                                                     |          | D       |
| gp026     | +         | 8,695  | 8,943  | hypothetical protein |                                                     |          | D       |
| gp027     | +         | 8,940  | 9,362  | hypothetical protein |                                                     |          | D       |
| gp028     | +         | 9,369  | 9,548  | hypothetical protein |                                                     |          | D       |
| gp029     | +         | 9,558  | 9,797  | hypothetical protein | contains restriction alleviation protein Lar domain |          | D       |
| gp030     | +         | 9,863  | 10,240 | hypothetical protein |                                                     |          | D       |
| gp031     | +         | 10,331 | 10,585 | hypothetical protein |                                                     |          | D       |
| gp032     | +         | 10,582 | 10,863 | hypothetical protein |                                                     |          | D       |
| gp033     | +         | 11,052 | 11,312 | hypothetical protein |                                                     |          | D       |
| gp034     | +         | 11,322 | 11,543 | hypothetical protein |                                                     |          | D       |
| gp035     | +         | 11,540 | 11,974 | hypothetical protein |                                                     |          | D       |
| gp036     | +         | 11,977 | 12,144 | hypothetical protein |                                                     |          | D       |
| gp037     | +         | 12,160 | 12,567 | hypothetical protein |                                                     |          | D       |
| gp038     | -         | 13,697 | 13,855 | hypothetical protein |                                                     |          | A       |
| gp039     | -         | 14,339 | 14,707 | hypothetical protein | contains phage GP30.8 protein domain                |          | A       |
| gp040     | -         | 14,776 | 15,144 | hypothetical protein |                                                     |          | A       |
| gp041     | -         | 15,605 | 15,892 | hypothetical protein |                                                     |          | A       |
| gp042     | -         | 15,903 | 16,088 | hypothetical protein |                                                     |          | A       |
| gp043     | -         | 16,134 | 16,493 | hypothetical protein |                                                     |          | A       |
| gp044     | -         | 16,579 | 16,962 | hypothetical protein |                                                     |          | A       |
| gp045     | -         | 16,977 | 17,111 | hypothetical protein |                                                     |          | A       |
| gp046     | -         | 17,185 | 17,535 | hypothetical protein |                                                     |          | A       |
| gp047     | -         | 17,539 | 17,832 | hypothetical protein |                                                     |          | A       |
| gp048     | -         | 17,878 | 18,177 | hypothetical protein |                                                     |          | A       |

| <b>Locus_tag</b> | <b>Direction</b> | <b>Min</b> | <b>Max</b> | <b>Product</b>                 | <b>Notes</b>                     | <b>Function</b> | <b>Cluster</b> |
|------------------|------------------|------------|------------|--------------------------------|----------------------------------|-----------------|----------------|
| gp049            | -                | 18,268     | 18,516     | hypothetical protein           |                                  |                 | A              |
| gp050            | -                | 18,578     | 18,802     | hypothetical protein           |                                  |                 | A              |
| gp051            | -                | 18,892     | 19,350     | hypothetical protein           |                                  |                 | A              |
| gp052            | -                | 19,689     | 19,850     | hypothetical protein           |                                  |                 | A              |
| gp053            | -                | 19,847     | 20,149     | hypothetical protein           |                                  |                 | A              |
| gp054            | -                | 20,149     | 20,409     | hypothetical protein           |                                  |                 | A              |
| gp055            | -                | 20,543     | 20,674     | hypothetical protein           |                                  |                 | A              |
| gp056            | -                | 20,677     | 20,967     | hypothetical protein           |                                  |                 | A              |
| gp057            | -                | 20,985     | 21,377     | hypothetical protein           |                                  |                 | A              |
| gp058            | -                | 21,456     | 21,800     | hypothetical protein           |                                  |                 | A              |
| gp059            | -                | 21,804     | 21,953     | hypothetical protein           |                                  |                 | A              |
| gp060            | -                | 22,009     | 22,359     | hypothetical protein           |                                  |                 | A              |
| gp061            | -                | 22,449     | 22,706     | hypothetical protein           |                                  |                 | A              |
| gp062            | -                | 22,752     | 22,973     | hypothetical protein           |                                  |                 | A              |
| gp063            | -                | 23,049     | 23,213     | hypothetical protein           |                                  |                 | A              |
| gp064            | -                | 23,291     | 23,533     | hypothetical protein           |                                  |                 | A              |
| gp065            | -                | 23,597     | 24,133     | hypothetical protein           |                                  |                 | A              |
| gp066            | -                | 24,223     | 24,444     | hypothetical protein           |                                  |                 | A              |
| gp067            | -                | 25,705     | 25,818     | putative DNA methylase         |                                  | DNA methylation | A              |
| gp068            | -                | 25,812     | 26,318     | HNH endonuclease               | contains HNH endonuclease domain | DNA metabolism  | A              |
| gp069            | -                | 26,324     | 27,016     | DNA cytosine methyltransferase |                                  | DNA methylation | A              |
| gp070            | -                | 27,013     | 27,360     | hypothetical protein           |                                  |                 | A              |
| gp071            | -                | 27,350     | 27,751     | hypothetical protein           |                                  |                 | A              |
| gp072            | -                | 27,752     | 27,997     | hypothetical protein           |                                  |                 | A              |



| <b>Locus_tag</b> | <b>Direction</b> | <b>Min</b> | <b>Max</b> | <b>Product</b>                            | <b>Notes</b>                                                 | <b>Function</b> | <b>Cluster</b> |
|------------------|------------------|------------|------------|-------------------------------------------|--------------------------------------------------------------|-----------------|----------------|
| gp073            | -                | 28,001     | 29,545     | putative DNA helicase                     | contains AAA domain and UvrD-like helicase C-terminal domain | DNA replication | A              |
| gp074            | -                | 29,542     | 29,949     | hypothetical protein                      |                                                              |                 | A              |
| gp075            | -                | 29,946     | 30,263     | hypothetical protein                      |                                                              |                 | A              |
| gp076            | -                | 30,379     | 30,888     | hypothetical protein                      |                                                              |                 | A              |
| gp077            | -                | 30,899     | 32,182     | hypothetical protein                      |                                                              |                 | A              |
| gp078            | -                | 32,378     | 32,614     | hypothetical protein                      | contains restriction alleviation protein Lar domain          |                 | A              |
| gp079            | -                | 32,752     | 34,104     | hypothetical protein                      |                                                              |                 | A              |
| gp080            | -                | 34,117     | 34,437     | hypothetical protein                      |                                                              |                 | A              |
| gp081            | -                | 34,444     | 34,692     | hypothetical protein                      |                                                              |                 | A              |
| gp082            | -                | 34,701     | 34,895     | hypothetical protein                      |                                                              |                 | A              |
| gp083            | -                | 34,892     | 35,089     | hypothetical protein                      |                                                              |                 | A              |
| gp084            | -                | 35,086     | 35,241     | hypothetical protein                      |                                                              |                 | A              |
| gp085            | -                | 35,241     | 35,336     | hypothetical protein                      |                                                              |                 | A              |
| gp086            | -                | 35,329     | 35,550     | hypothetical protein                      |                                                              |                 | A              |
| gp087            | -                | 35,550     | 35,918     | hypothetical protein                      |                                                              |                 | A              |
| gp088            | -                | 35,946     | 36,413     | hypothetical protein                      |                                                              |                 | A              |
| gp089            | -                | 36,424     | 36,558     | hypothetical protein                      |                                                              |                 | A              |
| gp090            | -                | 36,571     | 36,858     | hypothetical protein                      |                                                              |                 | A              |
| gp091            | -                | 36,842     | 37,396     | putative metal dependent phosphohydrolase |                                                              |                 | A              |
| gp092            | +                | 37,516     | 37,878     | hypothetical protein                      |                                                              |                 | B              |
| gp093            | +                | 37,881     | 38,252     | hypothetical protein                      |                                                              |                 | B              |
| gp094            | +                | 38,326     | 38,478     | hypothetical protein                      |                                                              |                 | B              |
| gp095            | +                | 38,478     | 38,801     | hypothetical protein                      |                                                              |                 | B              |

| Locus_tag | Direction | Min    | Max    | Product                                                          | Notes                                                                                                                 | Function       | Cluster |
|-----------|-----------|--------|--------|------------------------------------------------------------------|-----------------------------------------------------------------------------------------------------------------------|----------------|---------|
| gp096     | +         | 38,798 | 39,007 | hypothetical protein                                             |                                                                                                                       |                | B       |
| gp097     | +         | 39,000 | 39,341 | hypothetical protein                                             |                                                                                                                       |                | B       |
| gp098     | +         | 39,351 | 39,587 | hypothetical protein                                             |                                                                                                                       |                | B       |
| gp099     | +         | 39,590 | 40,288 | hypothetical protein                                             |                                                                                                                       |                | B       |
| gp100     | +         | 40,281 | 40,475 | hypothetical protein                                             | contains RNA repair pathway DNA polymerase beta family domain                                                         |                | B       |
| gp101     | +         | 40,476 | 41,237 | putative thioredoxin                                             |                                                                                                                       | DNA metabolism | B       |
| gp102     | +         | 41,234 | 41,515 | hypothetical protein                                             |                                                                                                                       |                | B       |
| gp103     | +         | 41,699 | 42,076 | hypothetical protein                                             |                                                                                                                       |                | B       |
| gp104     | +         | 42,091 | 42,753 | hypothetical protein                                             |                                                                                                                       |                | B       |
| gp105     | +         | 42,762 | 43,277 | putative phosphatase                                             |                                                                                                                       |                | B       |
| gp106     | +         | 43,287 | 44,216 | anti-sigma factor                                                |                                                                                                                       |                | B       |
| gp107     | +         | 44,213 | 44,332 | hypothetical protein                                             |                                                                                                                       |                | B       |
| gp108     | +         | 44,336 | 44,746 | hypothetical protein                                             |                                                                                                                       |                | B       |
| gp109     | +         | 44,759 | 45,196 | hypothetical protein                                             |                                                                                                                       |                | B       |
| gp110     | +         | 45,224 | 45,661 | hypothetical protein                                             |                                                                                                                       |                | B       |
| gp111     | +         | 45,699 | 46,985 | poly [ADP-ribose] polymerase                                     | contains WGR domain; Poly(ADP-ribose) polymerase, regulatory domain; and Poly(ADP-ribose) polymerase catalytic domain | DNA repair     | B       |
| gp112     | +         | 47,003 | 47,470 | hypothetical protein                                             |                                                                                                                       |                | B       |
| gp113     | +         | 47,483 | 47,890 | hypothetical protein                                             | contains Yqey-like protein domain                                                                                     |                | B       |
| gp114     | +         | 47,975 | 50,992 | ribonucleotide reductase of class III (anaerobic), large subunit | contains ATP cone domain and anaerobic ribonucleoside-triphosphate reductase domains                                  | DNA metabolism | B       |
| gp115     | +         | 51,002 | 51,253 | hypothetical protein                                             |                                                                                                                       |                | B       |

| <b>Locus_tag</b> | <b>Direction</b> | <b>Min</b> | <b>Max</b> | <b>Product</b>                                                           | <b>Notes</b>                                          | <b>Function</b> | <b>Cluster</b> |
|------------------|------------------|------------|------------|--------------------------------------------------------------------------|-------------------------------------------------------|-----------------|----------------|
| gp116            | +                | 51,253     | 51,732     | ribonucleotide reductase of class III<br>(anaerobic), activating protein | contains 4Fe-4S single cluster domain                 | DNA metabolism  | B              |
| gp117            | +                | 51,713     | 52,096     | hypothetical protein                                                     |                                                       |                 | B              |
| gp118            | +                | 52,106     | 52,288     | hypothetical protein                                                     |                                                       |                 | B              |
| gp119            | +                | 52,281     | 52,703     | NinX                                                                     | contains DUF2591 domain                               |                 | B              |
| gp120            | +                | 52,711     | 52,929     | hypothetical protein                                                     |                                                       |                 | B              |
| gp121            | +                | 52,926     | 53,258     | hypothetical protein                                                     |                                                       |                 | B              |
| gp122            | +                | 53,267     | 53,458     | bacterioferritin-associated ferredoxin                                   | contains BFD-like [2Fe-2S] binding domain             |                 | B              |
| gp123            | +                | 53,466     | 53,624     | hypothetical protein                                                     |                                                       |                 | B              |
| gp124            | +                | 53,653     | 54,630     | integral membrane protein TerC                                           | contains integral membrane protein TerC family domain |                 | B              |
| gp125            | +                | 54,675     | 55,037     | hypothetical protein                                                     |                                                       |                 | B              |
| gp126            | +                | 55,180     | 55,353     | hypothetical protein                                                     |                                                       |                 | B              |
| gp127            | +                | 55,343     | 55,528     | hypothetical protein                                                     |                                                       |                 | B              |
| gp128            | +                | 55,529     | 55,732     | hypothetical protein                                                     |                                                       |                 | B              |
| gp129            | +                | 55,719     | 55,976     | hypothetical protein                                                     |                                                       |                 | B              |
| gp130            | +                | 55,976     | 56,308     | hypothetical protein                                                     |                                                       |                 | B              |
| gp131            | +                | 56,329     | 57,042     | putative tellurium resistance protein                                    | contains vWA found in TerF C terminus domain          |                 | B              |
| gp132            | +                | 57,110     | 57,691     | TerD family protein                                                      | contains TerD domain                                  |                 | B              |
| gp133            | +                | 57,753     | 58,334     | TerD family protein                                                      | contains TerD domain                                  |                 | B              |
| gp134            | +                | 58,393     | 59,271     | hypothetical protein                                                     |                                                       |                 | B              |
| gp135            | +                | 59,282     | 60,358     | toxic anion (tellurite) resistance protein                               | contains toxic anion resistance protein (TelA) domain |                 | B              |
| gp136            | +                | 60,423     | 60,932     | cell wall hydrolase                                                      | contains cell wall hydrolase domain                   |                 | B              |
| gp137            | +                | 60,945     | 61,196     | hypothetical protein                                                     |                                                       |                 | B              |
| gp138            | +                | 61,193     | 61,783     | hypothetical protein                                                     |                                                       |                 | B              |
| gp139            | +                | 61,815     | 62,117     | hypothetical protein                                                     |                                                       |                 | B              |

| <b>Locus_tag</b> | <b>Direction</b> | <b>Min</b> | <b>Max</b> | <b>Product</b>            | <b>Notes</b>                                                         | <b>Function</b>       | <b>Cluster</b> |
|------------------|------------------|------------|------------|---------------------------|----------------------------------------------------------------------|-----------------------|----------------|
| gp140            | +                | 62,120     | 62,395     | hypothetical protein      |                                                                      |                       | B              |
| gp141            | +                | 62,395     | 63,045     | hypothetical protein      | putative hydrolase                                                   |                       | B              |
| gp142            | +                | 63,045     | 63,869     | hypothetical protein      | contains PRTase ComF-like domain                                     |                       | B              |
| gp143            | +                | 63,879     | 64,298     | hypothetical protein      |                                                                      |                       | B              |
| gp144            | +                | 64,291     | 64,551     | hypothetical protein      |                                                                      |                       | B              |
| gp145            | +                | 64,544     | 64,963     | hypothetical protein      |                                                                      |                       | B              |
| gp146            | +                | 64,960     | 65,139     | hypothetical protein      |                                                                      |                       | B              |
| gp147            | +                | 65,136     | 65,552     | putative Eaa I            |                                                                      |                       | B              |
| gp148            | +                | 65,549     | 66,055     | hypothetical protein      |                                                                      |                       | B              |
| gp149            | +                | 66,030     | 66,677     | hypothetical protein      |                                                                      |                       | B              |
| gp150            | +                | 66,714     | 66,965     | hypothetical protein      |                                                                      |                       | B              |
| gp151            | +                | 66,973     | 67,671     | hypothetical protein      |                                                                      |                       | B              |
| gp152            | +                | 67,685     | 69,484     | DNA primase/helicase      | contains Toprim-like domain and DnaB-like helicase C terminal domain | DNA replication       | B              |
| gp153            | +                | 69,501     | 71,717     | phage DNA polymerase I    | contains DNA polymerase family A domain                              | DNA replication       | B              |
| gp154            | +                | 71,810     | 72,670     | hypothetical protein      |                                                                      |                       | B              |
| gp155            | -                | 72,832     | 76,431     | hypothetical protein      | contains chaperone of endosialidase domain                           |                       | C              |
| gp156            | -                | 76,431     | 76,916     | hypothetical protein      |                                                                      |                       | C              |
| gp157            | -                | 76,946     | 77,272     | hypothetical protein      |                                                                      |                       | C              |
| gp158            | -                | 77,274     | 77,762     | hypothetical protein      | possible tail fiber assembly protein                                 |                       | C              |
| gp159            | -                | 77,764     | 78,792     | hypothetical protein      |                                                                      |                       | C              |
| gp160            | -                | 78,805     | 79,428     | hypothetical protein      |                                                                      |                       | C              |
| gp161            | -                | 79,438     | 80,922     | putative baseplate        | contains baseplate J-like protein domain                             | structural components | C              |
| gp162            | -                | 80,915     | 81,196     | putative membrane protein |                                                                      |                       | C              |
| gp163            | -                | 81,210     | 81,734     | hypothetical protein      |                                                                      |                       | C              |

| Locus_tag | Direction | Min    | Max    | Product                                           | Notes                                                                    | Function              | Cluster |
|-----------|-----------|--------|--------|---------------------------------------------------|--------------------------------------------------------------------------|-----------------------|---------|
| gp164     | -         | 81,737 | 82,390 | baseplate central spike                           | contains phage protein gp137 N-terminal domain                           | structural components | C       |
| gp165     | -         | 82,391 | 83,356 | hypothetical protein                              |                                                                          |                       | C       |
| gp166     | -         | 83,366 | 83,704 | hypothetical protein                              |                                                                          |                       | C       |
| gp167     | -         | 83,716 | 84,417 | hypothetical protein                              |                                                                          |                       | C       |
| gp168     | -         | 84,422 | 86,365 | putative cell envelope integrity protein<br>TolA  |                                                                          |                       | C       |
| gp169     | -         | 86,377 | 86,598 | hypothetical protein                              |                                                                          |                       | C       |
| gp170     | -         | 86,619 | 87,110 | hypothetical protein                              |                                                                          |                       | C       |
| gp171     | -         | 87,187 | 87,654 | hypothetical protein                              |                                                                          |                       | C       |
| gp172     | -         | 87,697 | 89,064 | putative tail sheath protein                      | contains DUF3383 domain                                                  | structural components | C       |
| gp173     | -         | 89,082 | 89,657 | hypothetical protein                              |                                                                          |                       | C       |
| gp174     | -         | 89,650 | 90,069 | hypothetical protein                              |                                                                          |                       | C       |
| gp175     | -         | 90,115 | 90,585 | hypothetical protein                              |                                                                          |                       | C       |
| gp176     | -         | 90,585 | 91,091 | hypothetical protein                              |                                                                          |                       | C       |
| gp177     | -         | 91,094 | 91,504 | hypothetical protein                              |                                                                          |                       | C       |
| gp178     | -         | 91,571 | 92,569 | major capsid protein                              | contains phage major capsid protein E domain                             | structural components | C       |
| gp179     | -         | 92,587 | 92,988 | putative head stabilization/decoration<br>protein |                                                                          | structural components | C       |
| gp180     | -         | 93,004 | 94,344 | hypothetical protein                              | possible scaffold protein                                                |                       | C       |
| gp181     | -         | 94,344 | 94,820 | hypothetical protein                              | contains putative phage serine protease Xkdf domain                      |                       | C       |
| gp182     | -         | 94,968 | 96,548 | hypothetical protein                              |                                                                          |                       | C       |
| gp183     | -         | 96,686 | 98,230 | putative terminase large subunit                  | contains terminase-like family domain and<br>terminaseRNaseH-like domain | DNA packaging         | C       |
| gp184     | -         | 98,352 | 98,651 | hypothetical protein                              |                                                                          |                       | C       |
| tRNA      | -         | 98,756 | 98,833 | tRNA-Lys-TTT                                      |                                                                          |                       | C       |

| Locus_tag | Direction | Min     | Max     | Product                                                       | Notes                                                                                                      | Function        | Cluster |
|-----------|-----------|---------|---------|---------------------------------------------------------------|------------------------------------------------------------------------------------------------------------|-----------------|---------|
| gp185     | -         | 98,841  | 98,957  | hypothetical protein                                          |                                                                                                            |                 | C       |
| tRNA      | -         | 98,980  | 99,055  | tRNA-Arg-TCT                                                  |                                                                                                            |                 | C       |
| gp186     | -         | 99,071  | 99,250  | hypothetical protein                                          | possible lysin                                                                                             |                 | C       |
| tRNA      | -         | 99,267  | 99,342  | tRNA-Gly-TCC                                                  |                                                                                                            |                 | C       |
| tRNA      | -         | 99,647  | 99,723  | tRNA-His-GTG                                                  |                                                                                                            |                 | C       |
| tRNA      | -         | 99,964  | 100,055 | tRNA-Leu-TAA                                                  |                                                                                                            |                 | C       |
| tRNA      | -         | 100,067 | 100,141 | tRNA-Ile2-CAT                                                 |                                                                                                            |                 | C       |
| gp187     | -         | 100,446 | 100,868 | hypothetical protein                                          | possible Rz spanin                                                                                         |                 | C       |
| gp188     | -         | 101,442 | 102,566 | IS200/IS605 family element transposase accessory protein TnpB | contains helix-turn-helix domain; probable transposase domain; and putative transposase DNA-binding domain | DNA integration | C       |
| gp189     | -         | 102,999 | 103,373 | hypothetical protein                                          |                                                                                                            |                 | C       |
| gp190     | -         | 103,459 | 104,154 | hypothetical protein                                          |                                                                                                            |                 | C       |
| gp191     | -         | 104,273 | 104,596 | hypothetical protein                                          |                                                                                                            |                 | C       |
| tRNA      | -         | 104,784 | 104,857 | tRNA-Trp-CCA                                                  |                                                                                                            |                 | C       |
| tRNA      | -         | 104,866 | 104,941 | tRNA-Phe-GAA                                                  |                                                                                                            |                 | C       |
| tRNA      | -         | 104,947 | 105,021 | tRNA-Asn-GTT                                                  |                                                                                                            |                 | C       |
| gp192     | -         | 105,022 | 105,216 | hypothetical protein                                          |                                                                                                            |                 | C       |
| tRNA      | -         | 105,263 | 105,340 | tRNA-Pro-TGG                                                  |                                                                                                            |                 | C       |
| tRNA      | -         | 105,347 | 105,421 | tRNA-Cys-GCA                                                  |                                                                                                            |                 | C       |
| tRNA      | -         | 105,596 | 105,671 | tRNA-Ile-GAT                                                  |                                                                                                            |                 | C       |
| tRNA      | -         | 105,678 | 105,763 | tRNA-Ser-GCT                                                  |                                                                                                            |                 | C       |
| tRNA      | -         | 105,844 | 105,929 | tRNA-Ser-TGA                                                  |                                                                                                            |                 | C       |
| tRNA      | -         | 105,936 | 106,013 | tRNA-Leu-TAG                                                  |                                                                                                            |                 | C       |
| tRNA      | -         | 106,024 | 106,101 | tRNA-Glu-TTC                                                  |                                                                                                            |                 | C       |
| tRNA      | -         | 106,110 | 106,223 | tRNA-Asp-GTC                                                  |                                                                                                            |                 | C       |

| Locus_tag | Direction | Min     | Max     | Product                                | Notes                                                                                                    | Function       | Cluster |
|-----------|-----------|---------|---------|----------------------------------------|----------------------------------------------------------------------------------------------------------|----------------|---------|
| tRNA      | -         | 106,230 | 106,306 | tRNA-Asp-GTC                           |                                                                                                          |                | C       |
| gp193     | -         | 106,786 | 108,225 | hypothetical protein                   | contains DUF2828 domain                                                                                  |                | C       |
| gp194     | -         | 108,308 | 108,550 | hypothetical protein                   |                                                                                                          |                | C       |
| gp195     | -         | 108,624 | 109,478 | hypothetical protein                   |                                                                                                          |                | C       |
| gp196     | -         | 109,568 | 111,253 | nicotinamide phosphoribosyltransferase | contains DUF5598 domain and nicotinate phosphoribosyltransferase (NAPRTase) family domain                |                | C       |
| gp197     | -         | 111,243 | 111,836 | HNH homing endonuclease                | contains NUMOD4 motif and HNH endonuclease domain                                                        | DNA metabolism | C       |
| gp198     | -         | 111,802 | 112,647 | ribose-phosphate pyrophosphokinase     | contains N-terminal domain of ribose phosphate pyrophosphokinase and a phosphoribosyl transferase domain | DNA metabolism | C       |
| gp199     | -         | 112,644 | 113,027 | hypothetical protein                   |                                                                                                          |                | C       |
| gp200     | +         | 113,366 | 113,662 | hypothetical protein                   |                                                                                                          |                | D       |
| gp201     | +         | 113,662 | 114,708 | ribosylnicotinamide kinase             | contains cytidyltransferase-like domain and AAA domain                                                   |                | D       |
| gp202     | +         | 114,723 | 114,908 | hypothetical protein                   |                                                                                                          |                | D       |
| gp203     | +         | 114,905 | 115,603 | nicotinamide mononucleotide transport  | contains nicotinamide mononucleotide transporter domain                                                  |                | D       |
| gp204     | +         | 115,633 | 115,950 | hypothetical protein                   |                                                                                                          |                | D       |
| gp205     | +         | 115,950 | 116,231 | hypothetical protein                   |                                                                                                          |                | D       |
| gp206     | +         | 116,484 | 117,119 | hypothetical protein                   |                                                                                                          |                | D       |
| gp207     | +         | 117,116 | 117,469 | hypothetical protein                   | possible restriction nuclease                                                                            |                | D       |
| gp208     | +         | 117,469 | 117,960 | hypothetical protein                   |                                                                                                          |                | D       |
| gp209     | +         | 117,962 | 118,519 | hypothetical protein                   | possible metallophosphoesterase                                                                          |                | D       |
| gp210     | +         | 118,678 | 119,598 | RNA ligase                             | contains RNA ligase domain                                                                               |                | D       |
| gp211     | +         | 119,598 | 119,942 | hypothetical protein                   |                                                                                                          |                | D       |
| gp212     | +         | 119,952 | 120,377 | hypothetical protein                   | contains AAA domain                                                                                      |                | D       |

| Locus_tag | Direction | Min     | Max     | Product                                          | Notes                                                                                | Function                   | Cluster |
|-----------|-----------|---------|---------|--------------------------------------------------|--------------------------------------------------------------------------------------|----------------------------|---------|
| gp213     | +         | 120,386 | 120,598 | hypothetical protein                             |                                                                                      |                            | D       |
| gp214     | +         | 120,598 | 121,374 | NAD-dependent protein deacetylase of SIR2 family | contains Sir2 family domain                                                          |                            | D       |
| gp215     | +         | 121,379 | 121,564 | hypothetical protein                             |                                                                                      |                            | D       |
| gp216     | +         | 121,567 | 121,785 | hypothetical protein                             |                                                                                      |                            | D       |
| gp217     | +         | 121,794 | 122,012 | hypothetical protein                             |                                                                                      |                            | D       |
| gp218     | +         | 122,009 | 123,370 | DNA ligase                                       | contains ATP dependent DNA ligase domain                                             | DNA replication and repair | D       |
| gp219     | +         | 123,372 | 124,031 | hypothetical protein                             | contains phosphoribosyl-ATP pyrophosphohydrolase domain                              |                            | D       |
| gp220     | +         | 124,039 | 124,146 | hypothetical protein                             |                                                                                      |                            | D       |
| gp221     | +         | 124,140 | 124,412 | hypothetical protein                             |                                                                                      |                            | D       |
| gp222     | +         | 124,425 | 125,360 | DNA recombination-dependent growth factor RdgC   | contains putative exonuclease RdgC domain                                            | DNA repair                 | D       |
| gp223     | +         | 125,418 | 125,645 | hypothetical protein                             |                                                                                      |                            | D       |
| gp224     | +         | 125,720 | 126,757 | exonuclease                                      |                                                                                      | DNA replication            | D       |
| gp225     | +         | 126,853 | 127,386 | hypothetical protein                             |                                                                                      |                            | D       |
| gp226     | +         | 127,350 | 127,934 | packaging and recombination endonuclease VII     | contains recombination endonuclease VII domain                                       | DNA repair                 | D       |
| gp227     | +         | 127,921 | 128,124 | hypothetical protein                             |                                                                                      |                            | D       |
| gp228     | +         | 128,121 | 129,059 | exonuclease                                      | contains RNase_H superfamily domain                                                  | DNA replication            | D       |
| gp229     | +         | 129,097 | 129,474 | hypothetical protein                             |                                                                                      |                            | D       |
| gp230     | +         | 129,474 | 129,641 | hypothetical protein                             |                                                                                      |                            | D       |
| gp231     | +         | 129,635 | 130,213 | hypothetical protein                             | contains 5' nucleotidase, deoxy (Pyrimidine), cytosolic type C protein (NT5C) domain |                            | D       |



| <b>Locus_tag</b> | <b>Direction</b> | <b>Min</b> | <b>Max</b> | <b>Product</b>                                    | <b>Notes</b>                                                         | <b>Function</b> | <b>Cluster</b> |
|------------------|------------------|------------|------------|---------------------------------------------------|----------------------------------------------------------------------|-----------------|----------------|
| gp232            | +                | 130,210    | 130,533    | hypothetical protein                              |                                                                      |                 | D              |
| gp233            | +                | 130,534    | 131,505    | putative thymidylate synthase                     | contains thymidylate synthase complementing protein domain           | DNA metabolism  | D              |
| gp234            | +                | 131,577    | 132,047    | hypothetical protein                              |                                                                      |                 | D              |
| gp235            | +                | 132,061    | 132,312    | hypothetical protein                              |                                                                      |                 | D              |
| gp236            | +                | 132,332    | 134,629    | ribonucleoside-diphosphate reductase              | contains ATP cone domain and ribonucleotide reductase, barrel domain | DNA replication | D              |
| gp237            | +                | 134,671    | 135,771    | ribonucleotide-diphosphate reductase subunit beta | contains ribonucleotide reductase, small chain domain                | DNA replication | D              |
| gp238            | +                | 135,784    | 136,038    | glutaredoxin                                      | contains glutaredoxin domain                                         | DNA metabolism  | D              |
| gp239            | +                | 136,047    | 136,187    | hypothetical protein                              |                                                                      |                 | D              |
| gp240            | +                | 136,187    | 136,588    | hypothetical protein                              |                                                                      |                 | D              |
| gp241            | +                | 136,598    | 137,092    | lysozyme                                          | contains phage lysozyme domain                                       | cell lysis      | D              |
| gp242            | +                | 137,170    | 137,916    | PhoH-like protein                                 | contains PhoH-like protein domain                                    |                 | D              |
| gp243            | +                | 137,923    | 138,384    | hypothetical protein                              |                                                                      |                 | D              |
| gp244            | +                | 138,422    | 139,336    | hypothetical protein                              |                                                                      |                 | D              |
| gp245            | +                | 139,290    | 140,063    | serine/threonine-protein phosphatase              | contains calcineurin-like phosphoesterase domain                     | DNA repair      | D              |
| gp246            | +                | 140,063    | 140,329    | hypothetical protein                              |                                                                      |                 | D              |
| gp247            | +                | 140,326    | 140,892    | hypothetical protein                              |                                                                      |                 | D              |
| gp248            | +                | 141,029    | 141,376    | putative DNA N-6-adenine methyltransferase        |                                                                      | DNA methylation | D              |

**Supplementary Table S6.** Genome annotations of *Klebsiella pneumoniae* phage vB\_KpM\_FBKp24.

| <b>Locus_tag</b> | <b>Direction</b> | <b>Min</b> | <b>Max</b> | <b>Product</b>                     | <b>Notes</b>                                  | <b>Function</b>       |
|------------------|------------------|------------|------------|------------------------------------|-----------------------------------------------|-----------------------|
| gp001            | -                | 1          | 561        | hypothetical protein               |                                               |                       |
| gp002            | +                | 619        | 2,178      | putative helicase                  |                                               | DNA replication       |
| gp003            | -                | 2,262      | 2,627      | hypothetical protein               |                                               |                       |
| gp004            | -                | 2,633      | 2,812      | hypothetical protein               |                                               |                       |
| gp005            | -                | 2,895      | 3,533      | hypothetical protein               |                                               |                       |
| gp006            | -                | 3,670      | 4,113      | hypothetical protein               | N-acetyltransferase domain-containing protein |                       |
| gp007            | -                | 4,221      | 5,564      | virion structural protein          |                                               | structural components |
| gp008            | -                | 5,564      | 6,184      | hypothetical protein               |                                               |                       |
| gp009            | -                | 6,184      | 7,557      | virion structural protein          |                                               | structural components |
| gp010            | -                | 7,570      | 9,111      | hypothetical protein               |                                               |                       |
| gp011            | -                | 9,180      | 10,103     | hypothetical protein               |                                               |                       |
| gp012            | -                | 10,186     | 11,415     | hypothetical protein               |                                               |                       |
| gp013            | -                | 11,425     | 12,666     | hypothetical protein               |                                               |                       |
| gp014            | -                | 12,681     | 14,129     | hypothetical protein               |                                               |                       |
| gp015            | -                | 14,221     | 16,647     | hypothetical protein               |                                               |                       |
| gp016            | -                | 16,673     | 17,200     | putative virion structural protein |                                               | structural components |
| gp017            | -                | 17,206     | 18,111     | putative virion structural protein |                                               | structural components |
| gp018            | -                | 18,129     | 19,370     | virion structural protein          |                                               | structural components |
| gp019            | +                | 19,407     | 20,582     | virion structural protein          |                                               | structural components |
| gp020            | +                | 20,582     | 23,488     | virion structural protein          |                                               | structural components |
| gp021            | -                | 23,532     | 24,764     | hypothetical protein               |                                               |                       |
| gp022            | -                | 24,733     | 25,773     | hypothetical protein               |                                               |                       |
| gp023            | -                | 25,784     | 26,242     | hypothetical protein               |                                               |                       |
| gp024            | -                | 26,256     | 27,563     | putative virion structural protein |                                               | structural components |

| <b>Locus_tag</b> | <b>Direction</b> | <b>Min</b> | <b>Max</b> | <b>Product</b>                                    | <b>Notes</b>         | <b>Function</b> |
|------------------|------------------|------------|------------|---------------------------------------------------|----------------------|-----------------|
| gp025            | +                | 27,694     | 29,430     | putative DNA polymerase                           |                      | DNA replication |
| gp026            | -                | 29,477     | 30,844     | putative DNA-directed RNA polymerase beta subunit |                      | transcription   |
| gp027            | -                | 30,837     | 31,676     | hypothetical protein                              |                      |                 |
| gp028            | +                | 31,757     | 32,185     | hypothetical protein                              |                      |                 |
| gp029            | +                | 32,178     | 33,893     | hypothetical protein                              |                      |                 |
| gp030            | +                | 33,911     | 34,273     | hypothetical protein                              |                      |                 |
| gp031            | +                | 34,288     | 34,926     | hypothetical protein                              |                      |                 |
| gp032            | -                | 34,983     | 35,966     | hypothetical protein                              |                      |                 |
| gp033            | +                | 36,038     | 38,032     | putative SNF2 domain/DEAD-like helicase           |                      | transcription   |
| gp034            | -                | 38,094     | 38,477     | hypothetical protein                              |                      |                 |
| gp035            | -                | 38,508     | 39,044     | hypothetical protein                              |                      |                 |
| gp036            | -                | 39,126     | 39,314     | hypothetical protein                              |                      |                 |
| gp037            | -                | 39,358     | 39,627     | hypothetical protein                              | possible DNA primase |                 |
| gp038            | -                | 39,828     | 40,016     | hypothetical protein                              |                      |                 |
| gp039            | -                | 40,013     | 40,489     | GNAT family N-acetyltransferase                   |                      |                 |
| gp040            | -                | 40,683     | 40,835     | hypothetical protein                              |                      |                 |
| tRNA             | -                | 41,672     | 41,761     | tRNA-Ser-GCT                                      |                      |                 |
| tRNA             | -                | 41,771     | 41,844     | tRNA-Asn-GTT                                      |                      |                 |
| tRNA             | -                | 41,851     | 41,925     | tRNA-Asp-GTC                                      |                      |                 |
| tRNA             | -                | 42,043     | 42,116     | tRNA-Gln-TTG                                      |                      |                 |
| tRNA             | -                | 42,125     | 42,208     | tRNA-Tyr-GTA                                      |                      |                 |
| gp041            | -                | 42,392     | 42,751     | hypothetical protein                              |                      |                 |
| tRNA             | -                | 42,834     | 42,907     | tRNA-Arg-TCT                                      |                      |                 |
| tRNA             | -                | 42,913     | 42,997     | tRNA-Leu-TAA                                      |                      |                 |
| tRNA             | -                | 43,003     | 43,078     | tRNA-Ile2-CAT                                     |                      |                 |

| Locus_tag | Direction | Min    | Max    | Product                                       | Notes | Function                                                    |
|-----------|-----------|--------|--------|-----------------------------------------------|-------|-------------------------------------------------------------|
| gp042     | -         | 43,130 | 43,294 | hypothetical protein                          |       |                                                             |
| gp043     | -         | 43,298 | 44,155 | TRAP transporter solute receptor, TAXI family |       | contains a NMT1-like family domain                          |
| gp044     | +         | 44,395 | 44,652 | hypothetical protein                          |       |                                                             |
| gp045     | -         | 44,667 | 44,837 | hypothetical protein                          |       |                                                             |
| gp046     | -         | 44,849 | 45,736 | hypothetical protein                          |       |                                                             |
| gp047     | -         | 45,806 | 45,922 | hypothetical protein                          |       |                                                             |
| tRNA      | -         | 46,041 | 46,120 | tRNA-Sup-TTA                                  |       |                                                             |
| gp048     | -         | 46,370 | 47,137 | hypothetical protein                          |       |                                                             |
| gp049     | -         | 47,244 | 47,825 | hypothetical protein                          |       |                                                             |
| gp050     | -         | 47,883 | 48,305 | hypothetical protein                          |       |                                                             |
| gp051     | -         | 48,431 | 48,721 | hypothetical protein                          |       |                                                             |
| gp052     | -         | 48,733 | 49,902 | hypothetical protein                          |       | AAA domain-containing protein                               |
| gp053     | -         | 50,010 | 50,351 | hypothetical protein                          |       |                                                             |
| gp054     | -         | 50,438 | 51,706 | hypothetical protein                          |       | AAA domain-containing protein, putative ATP-binding protein |
| gp055     | -         | 51,735 | 52,370 | hypothetical protein                          |       |                                                             |
| gp056     | -         | 52,386 | 52,757 | hypothetical protein                          |       | putative tRNA nuclease WapA                                 |
| gp057     | -         | 52,768 | 53,118 | hypothetical protein                          |       |                                                             |
| gp058     | -         | 53,151 | 53,510 | hypothetical protein                          |       |                                                             |
| gp059     | -         | 53,489 | 53,965 | hypothetical protein                          |       |                                                             |
| gp060     | -         | 53,976 | 54,578 | hypothetical protein                          |       |                                                             |
| gp061     | -         | 54,619 | 54,921 | hypothetical protein                          |       |                                                             |
| gp062     | -         | 55,283 | 56,239 | hypothetical protein                          |       |                                                             |
| gp063     | -         | 56,236 | 56,484 | hypothetical protein                          |       |                                                             |
| gp064     | -         | 56,510 | 56,875 | hypothetical protein                          |       |                                                             |

| Locus_tag | Direction | Min    | Max    | Product                                                            | Notes                                                                                                                      | Function        |
|-----------|-----------|--------|--------|--------------------------------------------------------------------|----------------------------------------------------------------------------------------------------------------------------|-----------------|
| gp065     | -         | 56,891 | 57,337 | macro domain containing protein                                    |                                                                                                                            |                 |
| gp066     | -         | 57,815 | 58,279 | GNAT family N-acetyltransferase                                    |                                                                                                                            |                 |
| gp067     | -         | 58,503 | 60,017 | putative helicase                                                  |                                                                                                                            | DNA replication |
| gp068     | -         | 60,173 | 62,140 | RNA polymerase beta subunit                                        | putative ATP-dependent DNA helicase                                                                                        | transcription   |
| gp069     | -         | 62,140 | 64,413 | Putative DNA-directed RNA polymerase beta subunit                  | RNA_pol_Rpb2_6 domain-containing protein                                                                                   | transcription   |
| gp070     | +         | 64,527 | 64,877 | hypothetical protein                                               |                                                                                                                            |                 |
| gp071     | -         | 64,970 | 65,203 | hypothetical protein                                               |                                                                                                                            |                 |
| gp072     | -         | 65,263 | 66,489 | hypothetical protein                                               |                                                                                                                            |                 |
| gp073     | -         | 66,519 | 68,042 | hypothetical protein                                               |                                                                                                                            |                 |
| gp074     | -         | 68,070 | 69,611 | hypothetical protein                                               |                                                                                                                            |                 |
| gp075     | -         | 69,714 | 70,499 | hypothetical protein                                               |                                                                                                                            |                 |
| gp076     | -         | 70,570 | 71,415 | hypothetical protein                                               |                                                                                                                            |                 |
| gp077     | -         | 71,427 | 71,654 | hypothetical protein                                               |                                                                                                                            |                 |
| gp078     | -         | 71,657 | 72,778 | putative nuclease SbcCD D subunit                                  |                                                                                                                            | DNA repair      |
| gp079     | -         | 72,768 | 73,325 | hypothetical protein                                               |                                                                                                                            |                 |
| gp080     | -         | 73,318 | 73,716 | hypothetical protein                                               |                                                                                                                            |                 |
| gp081     | -         | 73,809 | 74,429 | hypothetical protein                                               |                                                                                                                            |                 |
| gp082     | -         | 74,426 | 75,880 | Bifunctional DNA-directed RNA polymerase subunit beta-beta', RpoBC |                                                                                                                            | transcription   |
| gp083     | -         | 75,965 | 77,866 | hypothetical protein                                               | low similarity (62% query cover, 24% ident, 2e-11 e-value) to nuclear shell protein gp104 from Pseudomonas phage 201phi2-1 |                 |
| gp084     | -         | 79,189 | 81,405 | putative T4-like DNA polymerase                                    |                                                                                                                            | DNA replication |
| gp085     | -         | 81,517 | 81,939 | hypothetical protein                                               |                                                                                                                            |                 |
| gp086     | -         | 82,242 | 82,670 | hypothetical protein                                               |                                                                                                                            |                 |

| <b>Locus_tag</b> | <b>Direction</b> | <b>Min</b> | <b>Max</b> | <b>Product</b>                  | <b>Notes</b> | <b>Function</b> |
|------------------|------------------|------------|------------|---------------------------------|--------------|-----------------|
| gp087            | -                | 82,664     | 83,128     | hypothetical protein            |              |                 |
| gp088            | -                | 83,137     | 83,562     | hypothetical protein            |              |                 |
| gp089            | -                | 83,543     | 83,794     | hypothetical protein            |              |                 |
| gp090            | -                | 83,907     | 84,182     | hypothetical protein            |              |                 |
| gp091            | -                | 84,250     | 84,753     | hypothetical protein            |              |                 |
| gp092            | -                | 84,765     | 85,169     | hypothetical protein            |              |                 |
| gp093            | -                | 85,484     | 85,873     | hypothetical protein            |              |                 |
| gp094            | -                | 86,120     | 87,088     | putative tubulin like protein   |              |                 |
| gp095            | +                | 87,174     | 88,004     | hypothetical protein            |              |                 |
| gp096            | -                | 88,049     | 88,882     | hypothetical protein            |              |                 |
| gp097            | -                | 88,911     | 89,369     | hypothetical protein            |              |                 |
| gp098            | -                | 89,398     | 90,018     | hypothetical protein            |              |                 |
| gp099            | -                | 89,999     | 90,526     | hypothetical protein            |              |                 |
| gp100            | -                | 90,587     | 91,141     | hypothetical protein            |              |                 |
| gp101            | -                | 91,160     | 91,633     | hypothetical protein            |              |                 |
| gp102            | -                | 91,620     | 92,111     | hypothetical protein            |              |                 |
| gp103            | -                | 92,140     | 92,481     | hypothetical protein            |              |                 |
| gp104            | -                | 92,551     | 93,231     | putative lytic transglycosidase |              |                 |
| gp105            | -                | 93,326     | 93,976     | hypothetical protein            |              |                 |
| gp106            | -                | 94,186     | 94,596     | hypothetical protein            |              |                 |
| gp107            | -                | 94,692     | 95,057     | hypothetical protein            |              |                 |
| gp108            | -                | 95,047     | 95,412     | hypothetical protein            |              |                 |
| gp109            | -                | 95,458     | 95,847     | hypothetical protein            |              |                 |
| gp110            | -                | 95,888     | 96,208     | hypothetical protein            |              |                 |
| gp111            | -                | 96,270     | 96,593     | hypothetical protein            |              |                 |

| <b>Locus_tag</b> | <b>Direction</b> | <b>Min</b> | <b>Max</b> | <b>Product</b>                     | <b>Notes</b>                     | <b>Function</b>       |
|------------------|------------------|------------|------------|------------------------------------|----------------------------------|-----------------------|
| gp112            | +                | 96,728     | 97,972     | putative head structural protein   |                                  | structural components |
| gp113            | -                | 98,019     | 99,065     | hypothetical protein               |                                  |                       |
| gp114            | -                | 99,169     | 101,343    | terminase large subunit            |                                  | DNA packaging         |
| gp115            | -                | 101,432    | 103,141    | putative virion structural protein |                                  | structural components |
| gp116            | -                | 103,143    | 105,692    | putative virion structural protein |                                  | structural components |
| gp117            | -                | 105,710    | 106,648    | virion structural protein          |                                  | structural components |
| gp118            | +                | 106,812    | 108,881    | putative tail sheath protein       |                                  | structural components |
| gp119            | +                | 108,874    | 109,749    | putative virion structural protein | putative baseplate wedge protein | structural components |
| gp120            | +                | 109,880    | 110,524    | lytic transglycosylase             |                                  |                       |
| gp121            | +                | 110,535    | 110,648    | hypothetical protein               |                                  |                       |
| gp122            | -                | 110,703    | 111,299    | hypothetical protein               |                                  |                       |
| gp123            | -                | 111,296    | 111,799    | hypothetical protein               |                                  |                       |
| gp124            | -                | 111,771    | 112,715    | putative phosphohydrolase          |                                  |                       |
| gp125            | -                | 112,771    | 113,019    | hypothetical protein               |                                  |                       |
| gp126            | -                | 113,016    | 113,366    | hypothetical protein               |                                  |                       |
| gp127            | -                | 113,463    | 113,864    | hypothetical protein               |                                  |                       |
| gp128            | -                | 114,075    | 114,479    | hypothetical protein               |                                  |                       |
| gp129            | -                | 114,543    | 114,725    | hypothetical protein               |                                  |                       |
| gp130            | -                | 114,844    | 115,314    | hypothetical protein               |                                  |                       |
| gp131            | -                | 115,405    | 115,683    | hypothetical protein               |                                  |                       |
| gp132            | -                | 115,716    | 116,054    | hypothetical protein               |                                  |                       |
| gp133            | -                | 116,075    | 116,635    | hypothetical protein               |                                  |                       |
| gp134            | -                | 116,632    | 116,946    | hypothetical protein               |                                  |                       |
| gp135            | -                | 117,340    | 117,687    | hypothetical protein               |                                  |                       |
| gp136            | -                | 117,771    | 117,887    | hypothetical protein               |                                  |                       |

| Locus_tag | Direction | Min     | Max     | Product                                                                                                     | Notes | Function   |
|-----------|-----------|---------|---------|-------------------------------------------------------------------------------------------------------------|-------|------------|
| gp137     | -         | 117,887 | 118,057 | hypothetical protein                                                                                        |       |            |
| gp138     | -         | 118,072 | 118,230 | hypothetical protein                                                                                        |       |            |
| gp139     | +         | 118,389 | 118,928 | hypothetical protein                                                                                        |       |            |
| gp140     | -         | 118,969 | 119,388 | hypothetical protein                                                                                        |       |            |
| gp141     | -         | 119,460 | 119,951 | hypothetical protein                                                                                        |       |            |
| gp142     | -         | 120,012 | 120,416 | hypothetical protein                                                                                        |       |            |
| gp143     | -         | 120,400 | 120,771 | hypothetical protein                                                                                        |       |            |
| gp144     | -         | 120,839 | 121,255 | hypothetical protein                                                                                        |       |            |
| gp145     | -         | 121,397 | 121,660 | hypothetical protein                                                                                        |       |            |
| gp146     | -         | 121,743 | 122,186 | hypothetical protein                                                                                        |       |            |
| gp147     | -         | 122,192 | 122,383 | hypothetical protein                                                                                        |       |            |
| gp148     | -         | 122,383 | 122,715 | hypothetical protein                                                                                        |       |            |
| gp149     | -         | 122,699 | 122,920 | hypothetical protein                                                                                        |       |            |
| gp150     | -         | 122,926 | 123,333 | hypothetical protein                                                                                        |       |            |
| gp151     | -         | 123,330 | 123,827 | hypothetical protein                                                                                        |       |            |
| gp152     | -         | 123,796 | 124,494 | guanosine-3',5'-bis(diphosphate) 3'-pyrophosphohydrolase /<br>GTP pyrophosphokinase, (p)ppGpp synthetase II |       | regulation |
| gp153     | -         | 124,602 | 125,225 | hypothetical protein                                                                                        |       |            |
| gp154     | -         | 125,281 | 126,555 | hypothetical protein                                                                                        |       |            |
| gp155     | +         | 126,744 | 128,039 | hypothetical protein                                                                                        |       |            |
| gp156     | -         | 128,095 | 128,460 | hypothetical protein                                                                                        |       |            |
| gp157     | -         | 128,482 | 128,835 | hypothetical protein                                                                                        |       |            |
| gp158     | -         | 128,838 | 129,581 | hypothetical protein                                                                                        |       |            |
| gp159     | -         | 129,589 | 130,161 | hypothetical protein                                                                                        |       |            |
| gp160     | -         | 130,163 | 130,426 | hypothetical protein                                                                                        |       |            |



| <b>Locus_tag</b> | <b>Direction</b> | <b>Min</b> | <b>Max</b> | <b>Product</b>                                                   | <b>Notes</b> | <b>Function</b> |
|------------------|------------------|------------|------------|------------------------------------------------------------------|--------------|-----------------|
| gp161            | -                | 130,428    | 131,018    | thymidine kinase                                                 |              | DNA metabolism  |
| gp162            | -                | 131,020    | 131,295    | hypothetical protein                                             |              |                 |
| gp163            | -                | 131,292    | 131,651    | hypothetical protein                                             |              |                 |
| gp164            | -                | 131,705    | 132,310    | hypothetical protein                                             |              |                 |
| gp165            | -                | 132,315    | 132,683    | hypothetical protein                                             |              |                 |
| gp166            | -                | 132,680    | 133,267    | hypothetical protein                                             |              |                 |
| gp167            | -                | 133,281    | 133,568    | hypothetical protein                                             |              |                 |
| gp168            | +                | 133,771    | 136,416    | hypothetical protein                                             |              |                 |
| gp169            | -                | 136,450    | 136,710    | hypothetical protein                                             |              |                 |
| gp170            | -                | 136,707    | 137,111    | hypothetical protein                                             |              |                 |
| gp171            | -                | 137,166    | 137,978    | phosphate starvation-inducible protein PhoH, predicted<br>ATPase |              |                 |
| gp172            | -                | 138,073    | 138,420    | hypothetical protein                                             |              |                 |
| gp173            | -                | 138,499    | 138,861    | hypothetical protein                                             |              |                 |
| gp174            | -                | 138,874    | 139,173    | hypothetical protein                                             |              |                 |
| gp175            | -                | 139,225    | 139,692    | hypothetical protein                                             |              |                 |
| gp176            | +                | 139,828    | 141,288    | glycosyltransferase                                              |              |                 |
| gp177            | +                | 141,307    | 141,897    | hypothetical protein                                             |              |                 |
| gp178            | -                | 141,959    | 142,372    | hypothetical protein                                             |              |                 |
| gp179            | -                | 142,694    | 143,161    | hypothetical protein                                             |              |                 |
| gp180            | -                | 143,180    | 143,707    | DUF1190 domain containing protein                                |              |                 |
| gp181            | -                | 143,786    | 144,178    | hypothetical protein                                             |              |                 |
| gp182            | -                | 144,175    | 144,624    | hypothetical protein                                             |              |                 |
| gp183            | -                | 144,677    | 144,976    | hypothetical protein                                             |              |                 |
| gp184            | -                | 144,969    | 145,424    | hypothetical protein                                             |              |                 |

| <b>Locus_tag</b> | <b>Direction</b> | <b>Min</b> | <b>Max</b> | <b>Product</b>                                | <b>Notes</b>                                  | <b>Function</b>       |
|------------------|------------------|------------|------------|-----------------------------------------------|-----------------------------------------------|-----------------------|
| gp185            | -                | 145,421    | 145,873    | hypothetical protein                          |                                               |                       |
| gp186            | -                | 145,875    | 146,459    | DUF1653 domain-containing protein             |                                               |                       |
| gp187            | -                | 146,532    | 147,173    | hypothetical protein                          |                                               |                       |
| gp188            | -                | 147,177    | 147,596    | hypothetical protein                          |                                               |                       |
| gp189            | -                | 147,627    | 148,154    | hypothetical protein                          |                                               |                       |
| gp190            | -                | 148,199    | 149,713    | hypothetical protein                          |                                               |                       |
| gp191            | -                | 149,772    | 150,050    | hypothetical protein                          |                                               |                       |
| gp192            | -                | 150,082    | 150,450    | hypothetical protein                          |                                               |                       |
| gp193            | -                | 150,591    | 152,348    | nicotinamide phosphoribosyltransferase        |                                               |                       |
| gp194            | -                | 152,345    | 153,208    | ribose-phosphate pyrophosphokinase            |                                               |                       |
| gp195            | -                | 153,257    | 153,796    | dihydrofolate reductase                       |                                               |                       |
| gp196            | +                | 153,978    | 155,960    | putative tail fiber protein                   | contains head binding domain of P22 tailspike | structural components |
| gp197            | -                | 156,038    | 156,760    | HigA family addiction module antidote protein | contains helix-turn-helix domain              |                       |
| gp198            | -                | 156,816    | 157,229    | hypothetical protein                          |                                               |                       |
| gp199            | -                | 157,271    | 157,666    | hypothetical protein                          |                                               |                       |
| gp200            | -                | 157,668    | 158,078    | hypothetical protein                          |                                               |                       |
| gp201            | -                | 158,091    | 158,456    | hypothetical protein                          |                                               |                       |
| gp202            | -                | 158,588    | 159,394    | hypothetical protein                          |                                               |                       |
| gp203            | -                | 159,510    | 160,040    | hypothetical protein                          |                                               |                       |
| gp204            | -                | 160,059    | 160,499    | hypothetical protein                          |                                               |                       |
| gp205            | -                | 160,496    | 160,876    | hypothetical protein                          |                                               |                       |
| gp206            | -                | 160,942    | 162,630    | hypothetical protein                          |                                               |                       |
| gp207            | -                | 162,685    | 163,278    | hypothetical protein                          |                                               |                       |
| gp208            | -                | 163,268    | 163,636    | hypothetical protein                          |                                               |                       |
| gp209            | -                | 163,640    | 163,969    | hypothetical protein                          |                                               |                       |

| <b>Locus_tag</b> | <b>Direction</b> | <b>Min</b> | <b>Max</b> | <b>Product</b>                     | <b>Notes</b> | <b>Function</b> |
|------------------|------------------|------------|------------|------------------------------------|--------------|-----------------|
| gp210            | -                | 164,007    | 164,783    | hypothetical protein               |              |                 |
| gp211            | -                | 164,811    | 165,143    | hypothetical protein               |              |                 |
| gp212            | -                | 165,240    | 165,713    | hypothetical protein               |              |                 |
| gp213            | -                | 165,732    | 166,067    | hypothetical protein               |              |                 |
| gp214            | -                | 166,079    | 166,405    | hypothetical protein               |              |                 |
| gp215            | -                | 166,406    | 166,630    | hypothetical protein               |              |                 |
| gp216            | -                | 166,620    | 167,009    | hypothetical protein               |              |                 |
| gp217            | -                | 167,012    | 167,455    | hypothetical protein               |              |                 |
| gp218            | -                | 167,455    | 168,429    | hypothetical protein               |              |                 |
| gp219            | -                | 168,416    | 168,979    | hypothetical protein               |              |                 |
| gp220            | -                | 169,006    | 169,194    | hypothetical protein               |              |                 |
| gp221            | -                | 169,211    | 169,486    | hypothetical protein               |              |                 |
| gp222            | -                | 169,486    | 169,746    | hypothetical protein               |              |                 |
| gp223            | -                | 169,756    | 170,079    | hypothetical protein               |              |                 |
| gp224            | -                | 170,082    | 170,588    | hypothetical protein               |              |                 |
| gp225            | -                | 170,725    | 172,029    | AAA family ATPase                  |              |                 |
| gp226            | -                | 172,147    | 172,497    | hypothetical protein               |              |                 |
| gp227            | -                | 172,494    | 172,949    | hypothetical protein               |              |                 |
| gp228            | -                | 172,949    | 173,257    | hypothetical protein               |              |                 |
| gp229            | -                | 173,261    | 174,952    | hypothetical protein               |              |                 |
| gp230            | -                | 174,955    | 176,199    | putative tRNA-splicing ligase RtcB |              | RNA repair      |
| gp231            | -                | 176,214    | 176,933    | hypothetical protein               |              |                 |
| gp232            | -                | 176,952    | 177,515    | hypothetical protein               |              |                 |
| gp233            | -                | 177,518    | 177,787    | hypothetical protein               |              |                 |
| gp234            | -                | 177,777    | 178,289    | hypothetical protein               |              |                 |

| Locus_tag | Direction | Min     | Max     | Product                        | Notes                           | Function              |
|-----------|-----------|---------|---------|--------------------------------|---------------------------------|-----------------------|
| gp235     | -         | 178,289 | 178,663 | hypothetical protein           |                                 |                       |
| gp236     | -         | 178,665 | 179,048 | hypothetical protein           |                                 |                       |
| gp237     | -         | 179,045 | 179,290 | hypothetical protein           |                                 |                       |
| gp238     | +         | 179,325 | 179,657 | putative ammonia monooxygenase |                                 |                       |
| gp239     | -         | 179,705 | 181,096 | AAA family ATPase              |                                 |                       |
| gp240     | -         | 181,194 | 181,358 | hypothetical protein           |                                 |                       |
| gp241     | -         | 181,418 | 181,801 | hypothetical protein           |                                 |                       |
| gp242     | -         | 181,802 | 182,167 | hypothetical protein           |                                 |                       |
| gp243     | -         | 182,173 | 182,646 | hypothetical protein           | macro domain containing protein |                       |
| gp244     | -         | 182,665 | 183,282 | hypothetical protein           |                                 |                       |
| gp245     | -         | 183,288 | 183,887 | hypothetical protein           |                                 |                       |
| gp246     | -         | 183,897 | 184,304 | hypothetical protein           |                                 |                       |
| gp247     | -         | 184,308 | 185,525 | hypothetical protein           |                                 |                       |
| gp248     | -         | 185,585 | 185,893 | hypothetical protein           |                                 |                       |
| gp249     | -         | 185,893 | 186,024 | hypothetical protein           |                                 |                       |
| gp250     | -         | 186,021 | 187,412 | thymidylate synthase           |                                 | DNA metabolism        |
| gp251     | -         | 187,409 | 187,642 | hypothetical protein           |                                 |                       |
| gp252     | -         | 187,636 | 188,031 | hypothetical protein           |                                 |                       |
| gp253     | -         | 188,021 | 188,536 | hypothetical protein           |                                 |                       |
| gp254     | -         | 188,610 | 189,209 | tail protein                   |                                 | structural components |
| gp255     | -         | 189,214 | 189,699 | hypothetical protein           |                                 |                       |
| gp256     | -         | 189,723 | 190,133 | hypothetical protein           |                                 |                       |
| gp257     | -         | 190,193 | 190,555 | hypothetical protein           |                                 |                       |
| gp258     | -         | 190,552 | 191,109 | hypothetical protein           |                                 |                       |
| gp259     | -         | 191,106 | 191,669 | RNA 2'-phosphotransferase      |                                 |                       |

| Locus_tag | Direction | Min     | Max     | Product                                                                                                                  | Notes | Function |
|-----------|-----------|---------|---------|--------------------------------------------------------------------------------------------------------------------------|-------|----------|
| gp260     | -         | 191,662 | 192,180 | hypothetical protein                                                                                                     |       |          |
| gp261     | -         | 192,180 | 192,455 | hypothetical protein                                                                                                     |       |          |
| gp262     | -         | 192,442 | 193,161 | hypothetical protein                                                                                                     |       |          |
| gp263     | -         | 193,154 | 193,867 | hypothetical protein                                                                                                     |       |          |
| gp264     | -         | 193,867 | 194,355 | hypothetical protein                                                                                                     |       |          |
| gp265     | -         | 194,470 | 194,877 | hypothetical protein                                                                                                     |       |          |
| gp266     | -         | 194,958 | 195,506 | hypothetical protein                                                                                                     |       |          |
| gp267     | -         | 195,507 | 195,851 | hypothetical protein                                                                                                     |       |          |
| gp268     | -         | 195,916 | 197,055 | hypothetical protein                                                                                                     |       |          |
| gp269     | -         | 197,052 | 197,240 | hypothetical protein                                                                                                     |       |          |
| gp270     | -         | 197,261 | 197,665 | hypothetical protein                                                                                                     |       |          |
| gp271     | -         | 197,667 | 198,602 | hypothetical protein                                                                                                     |       |          |
| gp272     | -         | 198,613 | 198,960 | hypothetical protein                                                                                                     |       |          |
| gp273     | -         | 199,043 | 199,555 | hypothetical protein                                                                                                     |       |          |
| gp274     | -         | 199,572 | 200,021 | membrane protease subunit                                                                                                |       |          |
| gp275     | -         | 200,021 | 200,272 | hypothetical protein                                                                                                     |       |          |
| gp276     | -         | 200,300 | 200,989 | nicotinamide mononucleotide transporter                                                                                  |       |          |
| gp277     | -         | 200,986 | 201,138 | hypothetical protein                                                                                                     |       |          |
| gp278     | -         | 201,152 | 202,366 | multifunctional transcriptional regulator/nicotinamide-nucleotide adenylyltransferase/ribosylnicotinamide kinase<br>NadR |       |          |
| gp279     | -         | 202,386 | 202,697 | hypothetical protein                                                                                                     |       |          |
| gp280     | -         | 202,710 | 203,105 | hypothetical protein                                                                                                     |       |          |
| gp281     | -         | 203,114 | 203,347 | hypothetical protein                                                                                                     |       |          |
| gp282     | -         | 203,357 | 203,917 | hypothetical protein                                                                                                     |       |          |

| Locus_tag | Direction | Min     | Max     | Product                                          | Notes                                           | Function              |
|-----------|-----------|---------|---------|--------------------------------------------------|-------------------------------------------------|-----------------------|
| gp283     | -         | 203,918 | 204,178 | hypothetical protein                             |                                                 |                       |
| gp284     | -         | 204,189 | 204,314 | hypothetical protein                             |                                                 |                       |
| gp285     | -         | 204,379 | 205,014 | hypothetical protein                             |                                                 |                       |
| gp286     | -         | 205,011 | 205,304 | hypothetical protein                             |                                                 |                       |
| gp287     | -         | 205,301 | 205,735 | hypothetical protein                             |                                                 |                       |
| gp288     | -         | 205,760 | 206,251 | hypothetical protein                             |                                                 |                       |
| gp289     | -         | 206,229 | 206,507 | hypothetical protein                             |                                                 |                       |
| gp290     | -         | 206,509 | 206,736 | hypothetical protein                             |                                                 |                       |
| gp291     | -         | 206,747 | 207,154 | hypothetical protein                             |                                                 |                       |
| gp292     | -         | 207,142 | 207,570 | hypothetical protein                             |                                                 |                       |
| gp293     | -         | 207,589 | 208,176 | deoxyuridine 5'-triphosphate nucleotidohydrolase |                                                 | DNA metabolism        |
| gp294     | -         | 208,276 | 210,345 | bifunctional tail protein                        |                                                 | structural components |
| gp295     | -         | 210,361 | 212,400 | bifunctional tail protein                        |                                                 | structural components |
| gp296     | -         | 212,532 | 212,933 | hypothetical protein                             |                                                 |                       |
| gp297     | -         | 212,930 | 213,259 | hypothetical protein                             |                                                 |                       |
| gp298     | +         | 213,383 | 213,595 | hypothetical protein                             |                                                 |                       |
| gp299     | -         | 213,638 | 213,883 | hypothetical protein                             |                                                 |                       |
| gp300     | -         | 214,060 | 215,856 | putative tail fiber protein                      | contains beta-helix domain                      | structural components |
| gp301     | -         | 215,902 | 218,649 | hypothetical protein                             | tail spike N-terminal domain containing protein |                       |
| gp302     | -         | 218,757 | 218,951 | hypothetical protein                             |                                                 |                       |
| gp303     | -         | 218,951 | 220,936 | putative tail fiber protein                      |                                                 | structural components |
| gp304     | -         | 221,011 | 223,278 | putative tail fiber protein                      |                                                 | structural components |
| gp305     | -         | 223,346 | 223,639 | hypothetical protein                             |                                                 |                       |
| gp306     | -         | 223,651 | 226,302 | putative tail fiber protein                      |                                                 | structural components |
| gp307     | -         | 226,470 | 228,698 | hypothetical protein                             | beta-helix domain containing protein            |                       |

| <b>Locus_tag</b> | <b>Direction</b> | <b>Min</b> | <b>Max</b> | <b>Product</b>                                    | <b>Notes</b>                                                  | <b>Function</b>       |
|------------------|------------------|------------|------------|---------------------------------------------------|---------------------------------------------------------------|-----------------------|
| gp308            | +                | 228,908    | 231,121    | hypothetical protein                              | putative tail fiber or spike with GTPase (hydrolase) activity |                       |
| gp309            | +                | 231,199    | 233,454    | hypothetical protein                              | exopolysaccharide biosynthesis protein; putative tail fiber   |                       |
| gp310            | +                | 233,520    | 235,559    | hypothetical protein                              | peptidase S74 domain-containing protein; putative tail fiber  |                       |
| gp311            | +                | 235,573    | 235,794    | hypothetical protein                              |                                                               |                       |
| gp312            | +                | 235,874    | 237,868    | hypothetical protein                              | putative tail spike protein                                   |                       |
| gp313            | +                | 237,880    | 239,541    | hypothetical protein                              |                                                               |                       |
| gp314            | -                | 239,593    | 240,159    | hypothetical protein                              | putative virion structural protein                            |                       |
| gp315            | -                | 240,210    | 240,596    | hypothetical protein                              |                                                               |                       |
| gp316            | -                | 240,660    | 241,184    | hypothetical protein                              |                                                               |                       |
| gp317            | -                | 241,239    | 241,790    | hypothetical protein                              |                                                               |                       |
| gp318            | -                | 241,883    | 242,344    | hypothetical protein                              |                                                               |                       |
| gp319            | -                | 242,505    | 243,155    | hypothetical protein                              |                                                               |                       |
| gp320            | -                | 243,227    | 243,958    | hypothetical protein                              |                                                               |                       |
| gp321            | -                | 244,085    | 244,246    | hypothetical protein                              |                                                               |                       |
| gp322            | -                | 244,285    | 244,974    | hypothetical protein                              |                                                               |                       |
| gp323            | -                | 245,080    | 245,826    | virion structural protein                         | possible prohead core protein protease                        | structural components |
| gp324            | -                | 245,830    | 246,558    | hypothetical protein                              |                                                               |                       |
| gp325            | -                | 246,560    | 247,285    | hypothetical protein                              |                                                               |                       |
| gp326            | -                | 247,297    | 248,829    | hypothetical protein                              |                                                               |                       |
| gp327            | -                | 248,829    | 249,020    | hypothetical protein                              |                                                               |                       |
| gp328            | -                | 249,101    | 253,579    | RNA polymerase beta subunit                       |                                                               | transcription         |
| gp329            | -                | 253,596    | 255,227    | putative DNA-directed RNA polymerase beta subunit |                                                               | transcription         |

| <b>Locus_tag</b> | <b>Direction</b> | <b>Min</b> | <b>Max</b> | <b>Product</b>                     | <b>Notes</b> | <b>Function</b>                                    |
|------------------|------------------|------------|------------|------------------------------------|--------------|----------------------------------------------------|
| gp330            | +                | 255,274    | 261,879    | hypothetical protein               |              | putative tail fiber with transglycosylase activity |
| gp331            | +                | 261,933    | 264,077    | hypothetical protein               |              |                                                    |
| gp332            | -                | 264,119    | 264,463    | hypothetical protein               |              |                                                    |
| gp333            | -                | 264,547    | 265,614    | hypothetical protein               |              |                                                    |
| gp334            | -                | 265,605    | 265,898    | hypothetical protein               |              |                                                    |
| gp335            | -                | 265,980    | 266,735    | hypothetical protein               |              |                                                    |
| gp336            | -                | 266,748    | 267,266    | hypothetical protein               |              |                                                    |
| gp337            | +                | 267,395    | 267,916    | hypothetical protein               |              |                                                    |
| gp338            | -                | 267,956    | 268,657    | hypothetical protein               |              |                                                    |
| gp339            | -                | 268,654    | 269,130    | hypothetical protein               |              |                                                    |
| gp340            | -                | 269,135    | 269,806    | virion structural protein          |              | structural components                              |
| gp341            | -                | 270,182    | 270,469    | hypothetical protein               |              |                                                    |
| gp342            | -                | 270,488    | 271,903    | UvsX DNA recombinase               |              | DNA replication and repair                         |
| gp343            | +                | 272,012    | 272,884    | hypothetical protein               |              |                                                    |
| gp344            | -                | 272,927    | 273,304    | hypothetical protein               |              |                                                    |
| gp345            | -                | 273,301    | 274,899    | RnhA ribonuclease HI               |              | DNA replication                                    |
| gp346            | -                | 274,956    | 275,384    | hypothetical protein               |              |                                                    |
| gp347            | +                | 275,443    | 276,744    | putative virion structural protein |              | structural components                              |
| gp348            | +                | 276,747    | 277,349    | hypothetical protein               |              |                                                    |
| gp349            | -                | 277,424    | 277,675    | hypothetical protein               |              |                                                    |
| gp350            | -                | 277,783    | 278,028    | hypothetical protein               |              |                                                    |
| gp351            | -                | 278,030    | 278,353    | hypothetical protein               |              |                                                    |
| gp352            | -                | 278,343    | 278,984    | hypothetical protein               |              |                                                    |
| gp353            | -                | 279,077    | 281,548    | nuclease SbcCD subunit C           |              | DNA repair                                         |



| <b>Locus_tag</b> | <b>Direction</b> | <b>Min</b> | <b>Max</b> | <b>Product</b>                     | <b>Notes</b>                         | <b>Function</b>       |
|------------------|------------------|------------|------------|------------------------------------|--------------------------------------|-----------------------|
| gp354            | +                | 281,627    | 282,616    | hypothetical protein               |                                      |                       |
| gp355            | -                | 282,660    | 283,190    | hypothetical protein               |                                      |                       |
| gp356            | -                | 283,206    | 284,561    | YomR                               |                                      |                       |
| gp357            | -                | 284,575    | 286,806    | putative tail fiber protein        |                                      | structural components |
| gp358            | +                | 286,872    | 288,116    | putative virion structural protein |                                      | structural components |
| gp359            | +                | 288,119    | 288,718    | putative spanin                    |                                      | cell lysis            |
| gp360            | -                | 288,763    | 289,380    | hypothetical protein               |                                      |                       |
| gp361            | -                | 289,380    | 289,997    | thymidylate kinase                 |                                      | DNA metabolism        |
| gp362            | -                | 290,010    | 290,591    | hypothetical protein               | possible RuvC-like resolvase         |                       |
| gp363            | -                | 290,677    | 291,822    | hypothetical protein               |                                      |                       |
| gp364            | -                | 291,837    | 292,754    | virion structural protein          |                                      | structural components |
| gp365            | -                | 292,864    | 293,406    | hypothetical protein               |                                      |                       |
| gp366            | -                | 293,440    | 294,282    | putative virion structural protein |                                      | structural components |
| gp367            | -                | 294,362    | 296,806    | virion structural protein          |                                      | structural components |
| gp368            | +                | 296,871    | 299,660    | virion structural protein          |                                      | structural components |
| gp369            | -                | 299,732    | 301,936    | hypothetical protein               |                                      |                       |
| gp370            | -                | 301,967    | 303,577    | hypothetical protein               | putative RNA polymerase beta subunit |                       |
| gp371            | -                | 303,599    | 304,594    | hypothetical protein               |                                      |                       |
| gp372            | -                | 304,809    | 307,097    | major head protein                 |                                      | structural components |

**Supplementary Table S7.** Analysis of codon usage of phages vB\_KpP\_FBKp27, vB\_KpM\_FBKp34, vB\_KpM\_FBKp24 and *Klebsiella pneumoniae* HS11286 using Cusp from EMBOSS.

| Codon | AA <sup>a</sup> | φKp27                 |           |      |                   | φKp34    |           |      |                   | φKp24    |           |      |                   | <i>K. pneumoniae</i> HS11286 |           |       |
|-------|-----------------|-----------------------|-----------|------|-------------------|----------|-----------|------|-------------------|----------|-----------|------|-------------------|------------------------------|-----------|-------|
|       |                 | Fraction <sup>b</sup> | Frequency | No.  | Ratio to bacteria | Fraction | Frequency | No.  | Ratio to bacteria | Fraction | Frequency | No.  | Ratio to bacteria | Fraction                     | Frequency | No.   |
| GCA   | A               | 0.25                  | 23.25     | 549  | 2.93              | 0.43     | 25.15     | 1061 | 3.17              | 0.25     | 16.80     | 1597 | 2.12              | 0.08                         | 7.94      | 12537 |
| GCC   | A               | 0.16                  | 14.70     | 347  | 0.34              | 0.11     | 6.38      | 269  | 0.15              | 0.21     | 14.36     | 1365 | 0.33              | 0.42                         | 43.25     | 68298 |
| GCG   | A               | 0.03                  | 2.50      | 59   | 0.06              | 0.08     | 4.46      | 188  | 0.10              | 0.31     | 21.04     | 2000 | 0.49              | 0.41                         | 42.99     | 67889 |
| GCT   | A               | 0.56                  | 51.04     | 1205 | 5.06              | 0.38     | 22.07     | 931  | 2.19              | 0.24     | 16.26     | 1545 | 1.61              | 0.10                         | 10.09     | 15928 |
| TGC   | C               | 0.34                  | 3.18      | 75   | 0.40              | 0.25     | 3.34      | 141  | 0.42              | 0.42     | 3.63      | 345  | 0.46              | 0.73                         | 7.98      | 12595 |
| TGT   | C               | 0.66                  | 6.14      | 145  | 2.03              | 0.75     | 10.12     | 427  | 3.35              | 0.58     | 5.06      | 481  | 1.67              | 0.28                         | 3.03      | 4777  |
| GAC   | D               | 0.28                  | 16.60     | 392  | 0.70              | 0.23     | 14.53     | 613  | 0.61              | 0.45     | 26.95     | 2561 | 1.13              | 0.47                         | 23.82     | 37612 |
| GAT   | D               | 0.72                  | 43.63     | 1030 | 1.64              | 0.77     | 49.87     | 2104 | 1.88              | 0.56     | 33.62     | 3195 | 1.26              | 0.53                         | 26.60     | 42007 |
| GAA   | E               | 0.64                  | 40.92     | 966  | 1.49              | 0.72     | 53.59     | 2261 | 1.96              | 0.68     | 44.74     | 4252 | 1.63              | 0.51                         | 27.39     | 43255 |
| GAG   | E               | 0.36                  | 22.91     | 541  | 0.86              | 0.28     | 20.93     | 883  | 0.79              | 0.32     | 20.65     | 1963 | 0.77              | 0.49                         | 26.66     | 42100 |
| TTC   | F               | 0.55                  | 19.65     | 464  | 1.01              | 0.30     | 13.51     | 570  | 0.70              | 0.49     | 23.30     | 2214 | 1.20              | 0.51                         | 19.42     | 30677 |
| TTT   | F               | 0.46                  | 16.39     | 387  | 0.87              | 0.70     | 31.62     | 1334 | 1.68              | 0.51     | 23.92     | 2273 | 1.27              | 0.49                         | 18.81     | 29712 |
| GGA   | G               | 0.10                  | 6.27      | 148  | 1.06              | 0.25     | 14.84     | 626  | 2.52              | 0.17     | 10.66     | 1013 | 1.81              | 0.08                         | 5.89      | 9306  |
| GGC   | G               | 0.19                  | 12.41     | 293  | 0.29              | 0.11     | 6.87      | 290  | 0.16              | 0.21     | 13.09     | 1244 | 0.31              | 0.56                         | 42.48     | 67081 |
| GGG   | G               | 0.14                  | 9.06      | 214  | 0.63              | 0.11     | 6.80      | 287  | 0.47              | 0.25     | 16.11     | 1531 | 1.11              | 0.19                         | 14.47     | 22847 |
| GGT   | G               | 0.57                  | 36.98     | 873  | 2.84              | 0.53     | 31.91     | 1346 | 2.45              | 0.38     | 24.11     | 2291 | 1.85              | 0.17                         | 13.00     | 20537 |
| CAC   | H               | 0.40                  | 6.99      | 165  | 0.62              | 0.30     | 5.67      | 239  | 0.50              | 0.48     | 7.77      | 738  | 0.69              | 0.50                         | 11.34     | 17901 |
| CAT   | H               | 0.60                  | 10.46     | 247  | 0.92              | 0.71     | 13.54     | 571  | 1.19              | 0.52     | 8.55      | 813  | 0.75              | 0.50                         | 11.41     | 18018 |
| ATA   | I               | 0.08                  | 4.41      | 104  | 1.43              | 0.16     | 10.95     | 462  | 3.55              | 0.10     | 6.53      | 621  | 2.12              | 0.06                         | 3.09      | 4877  |
| ATC   | I               | 0.45                  | 25.03     | 591  | 0.78              | 0.24     | 16.40     | 692  | 0.51              | 0.43     | 27.66     | 2629 | 0.86              | 0.58                         | 32.23     | 50902 |
| ATT   | I               | 0.47                  | 26.05     | 615  | 1.28              | 0.60     | 40.30     | 1700 | 1.98              | 0.47     | 30.78     | 2925 | 1.51              | 0.37                         | 20.34     | 32115 |
| AAA   | K               | 0.58                  | 37.32     | 881  | 1.51              | 0.74     | 61.56     | 2597 | 2.49              | 0.73     | 41.80     | 3973 | 1.69              | 0.64                         | 24.68     | 38981 |
| AAG   | K               | 0.42                  | 27.02     | 638  | 1.96              | 0.26     | 21.50     | 907  | 1.56              | 0.28     | 15.88     | 1509 | 1.15              | 0.36                         | 13.77     | 21748 |

| Codon | AA <sup>a</sup> | ϕKp27                 |           |     |                   | ϕKp34    |           |      |                   | ϕKp24    |           |      |                   | <i>K. pneumoniae</i> HS11286 |           |        |
|-------|-----------------|-----------------------|-----------|-----|-------------------|----------|-----------|------|-------------------|----------|-----------|------|-------------------|------------------------------|-----------|--------|
|       |                 | Fraction <sup>b</sup> | Frequency | No. | Ratio to bacteria | Fraction | Frequency | No.  | Ratio to bacteria | Fraction | Frequency | No.  | Ratio to bacteria | Fraction                     | Frequency | No.    |
| CTA   | L               | 0.06                  | 4.83      | 114 | 1.62              | 0.09     | 7.70      | 325  | 2.58              | 0.06     | 5.52      | 525  | 1.85              | 0.03                         | 2.98      | 4711   |
| CTC   | L               | 0.11                  | 9.40      | 222 | 0.61              | 0.05     | 4.39      | 185  | 0.29              | 0.16     | 14.03     | 1333 | 0.91              | 0.14                         | 15.35     | 24245  |
| CTG   | L               | 0.41                  | 35.32     | 834 | 0.49              | 0.12     | 10.00     | 422  | 0.14              | 0.22     | 19.37     | 1841 | 0.27              | 0.65                         | 71.38     | 112738 |
| CTT   | L               | 0.18                  | 15.54     | 367 | 2.00              | 0.28     | 23.09     | 974  | 2.97              | 0.17     | 15.00     | 1426 | 1.93              | 0.07                         | 7.79      | 12296  |
| TTA   | L               | 0.16                  | 14.23     | 336 | 2.27              | 0.31     | 25.60     | 1080 | 4.08              | 0.24     | 21.55     | 2048 | 3.43              | 0.06                         | 6.28      | 9910   |
| TTG   | L               | 0.09                  | 7.50      | 177 | 1.11              | 0.15     | 12.40     | 523  | 1.84              | 0.16     | 13.95     | 1326 | 2.07              | 0.06                         | 6.74      | 10649  |
| ATG   | M               | 1.00                  | 29.10     | 687 | 1.09              | 1.00     | 24.34     | 1027 | 0.91              | 1.00     | 21.21     | 2016 | 0.79              | 1.00                         | 26.77     | 42285  |
| AAC   | N               | 0.53                  | 27.95     | 660 | 1.27              | 0.30     | 16.14     | 681  | 0.73              | 0.53     | 28.19     | 2679 | 1.28              | 0.65                         | 21.98     | 34709  |
| AAT   | N               | 0.47                  | 24.65     | 582 | 2.04              | 0.70     | 37.26     | 1572 | 3.08              | 0.47     | 25.12     | 2387 | 2.08              | 0.36                         | 12.09     | 19101  |
| CCA   | P               | 0.31                  | 12.20     | 288 | 3.05              | 0.41     | 12.14     | 512  | 3.04              | 0.19     | 7.50      | 713  | 1.88              | 0.09                         | 4.00      | 6310   |
| CCC   | P               | 0.10                  | 3.73      | 88  | 0.49              | 0.05     | 1.54      | 65   | 0.20              | 0.15     | 5.87      | 558  | 0.77              | 0.16                         | 7.59      | 11987  |
| CCG   | P               | 0.09                  | 3.60      | 85  | 0.12              | 0.09     | 2.77      | 117  | 0.09              | 0.37     | 14.55     | 1383 | 0.48              | 0.65                         | 30.15     | 47615  |
| CCT   | P               | 0.50                  | 19.61     | 463 | 4.18              | 0.45     | 13.39     | 565  | 2.86              | 0.29     | 11.65     | 1107 | 2.48              | 0.10                         | 4.69      | 7406   |
| CAA   | Q               | 0.38                  | 17.41     | 411 | 2.52              | 0.68     | 22.02     | 929  | 3.19              | 0.54     | 17.69     | 1681 | 2.56              | 0.15                         | 6.91      | 10906  |
| CAG   | Q               | 0.62                  | 28.67     | 677 | 0.75              | 0.32     | 10.31     | 435  | 0.27              | 0.46     | 15.32     | 1456 | 0.40              | 0.85                         | 38.05     | 60087  |
| AGA   | R               | 0.10                  | 4.36      | 103 | 2.62              | 0.35     | 13.44     | 567  | 8.06              | 0.12     | 6.02      | 572  | 3.61              | 0.03                         | 1.67      | 2632   |
| AGG   | R               | 0.06                  | 2.41      | 57  | 1.45              | 0.10     | 3.67      | 155  | 2.20              | 0.05     | 2.75      | 261  | 1.65              | 0.03                         | 1.67      | 2636   |
| CGA   | R               | 0.08                  | 3.56      | 84  | 1.35              | 0.09     | 3.56      | 150  | 1.35              | 0.13     | 6.82      | 648  | 2.59              | 0.04                         | 2.63      | 4151   |
| CGC   | R               | 0.09                  | 3.69      | 87  | 0.12              | 0.06     | 2.42      | 102  | 0.08              | 0.21     | 10.60     | 1007 | 0.34              | 0.52                         | 31.08     | 49083  |
| CGG   | R               | 0.04                  | 1.61      | 38  | 0.16              | 0.04     | 1.40      | 59   | 0.14              | 0.13     | 6.49      | 617  | 0.65              | 0.17                         | 9.91      | 15656  |
| CGT   | R               | 0.63                  | 26.68     | 630 | 2.04              | 0.36     | 13.63     | 575  | 1.04              | 0.36     | 18.49     | 1757 | 1.41              | 0.22                         | 13.08     | 20659  |
| AGC   | S               | 0.14                  | 8.77      | 207 | 0.40              | 0.09     | 5.57      | 235  | 0.26              | 0.13     | 8.83      | 839  | 0.40              | 0.38                         | 21.83     | 34478  |
| AGT   | S               | 0.19                  | 11.48     | 271 | 2.62              | 0.25     | 16.31     | 688  | 3.72              | 0.21     | 14.03     | 1333 | 3.20              | 0.08                         | 4.39      | 6929   |
| TCA   | S               | 0.17                  | 10.55     | 249 | 2.63              | 0.22     | 14.06     | 593  | 3.51              | 0.14     | 9.05      | 860  | 2.26              | 0.07                         | 4.01      | 6333   |
| TCC   | S               | 0.13                  | 7.96      | 188 | 0.72              | 0.06     | 4.10      | 173  | 0.37              | 0.15     | 9.81      | 932  | 0.89              | 0.19                         | 11.05     | 17449  |
| TCG   | S               | 0.04                  | 2.33      | 55  | 0.20              | 0.03     | 1.71      | 72   | 0.15              | 0.15     | 9.93      | 944  | 0.86              | 0.20                         | 11.56     | 18263  |

| Codon | AA <sup>a</sup> | φKp27                 |           |     |                   | φKp34    |           |      |                   | φKp24    |           |      |                   | <i>K. pneumoniae</i> HS11286 |           |       |
|-------|-----------------|-----------------------|-----------|-----|-------------------|----------|-----------|------|-------------------|----------|-----------|------|-------------------|------------------------------|-----------|-------|
|       |                 | Fraction <sup>b</sup> | Frequency | No. | Ratio to bacteria | Fraction | Frequency | No.  | Ratio to bacteria | Fraction | Frequency | No.  | Ratio to bacteria | Fraction                     | Frequency | No.   |
| TCT   | S               | 0.33                  | 19.95     | 471 | 4.46              | 0.35     | 22.68     | 957  | 5.07              | 0.22     | 14.92     | 1418 | 3.34              | 0.08                         | 4.47      | 7062  |
| ACA   | T               | 0.18                  | 11.65     | 275 | 4.35              | 0.40     | 22.14     | 934  | 8.27              | 0.19     | 12.65     | 1202 | 4.73              | 0.05                         | 2.68      | 4226  |
| ACC   | T               | 0.27                  | 18.04     | 426 | 0.58              | 0.12     | 6.87      | 290  | 0.22              | 0.31     | 20.25     | 1925 | 0.65              | 0.61                         | 31.30     | 49424 |
| ACG   | T               | 0.05                  | 3.47      | 82  | 0.27              | 0.06     | 3.46      | 146  | 0.27              | 0.24     | 16.04     | 1524 | 1.24              | 0.25                         | 12.94     | 20435 |
| ACT   | T               | 0.50                  | 33.16     | 783 | 6.94              | 0.42     | 23.61     | 996  | 4.94              | 0.26     | 17.25     | 1639 | 3.61              | 0.09                         | 4.78      | 7550  |
| GTA   | V               | 0.38                  | 23.42     | 553 | 3.42              | 0.33     | 21.90     | 924  | 3.20              | 0.22     | 15.32     | 1456 | 2.24              | 0.10                         | 6.85      | 10811 |
| GTC   | V               | 0.12                  | 7.16      | 169 | 0.34              | 0.10     | 6.28      | 265  | 0.30              | 0.26     | 17.53     | 1666 | 0.83              | 0.30                         | 21.08     | 33297 |
| GTG   | V               | 0.20                  | 11.99     | 283 | 0.37              | 0.12     | 7.94      | 335  | 0.25              | 0.18     | 12.44     | 1182 | 0.39              | 0.46                         | 32.30     | 51014 |
| GTT   | V               | 0.30                  | 18.59     | 439 | 1.80              | 0.45     | 29.70     | 1253 | 2.87              | 0.34     | 23.25     | 2210 | 2.25              | 0.15                         | 10.33     | 16318 |
| TGG   | W               | 1.00                  | 12.75     | 301 | 0.80              | 1.00     | 14.58     | 615  | 0.91              | 1.00     | 13.54     | 1287 | 0.85              | 1.00                         | 15.96     | 25204 |
| TAC   | Y               | 0.39                  | 14.02     | 331 | 1.08              | 0.26     | 12.11     | 511  | 0.93              | 0.54     | 21.70     | 2062 | 1.67              | 0.48                         | 13.03     | 20574 |
| TAT   | Y               | 0.61                  | 21.81     | 515 | 1.54              | 0.74     | 33.99     | 1434 | 2.39              | 0.46     | 18.66     | 1773 | 1.31              | 0.52                         | 14.21     | 22439 |
| TAA   | * <sup>c</sup>  | 0.70                  | 2.75      | 65  | 1.39              | 0.59     | 3.46      | 146  | 1.75              | 0.66     | 2.57      | 244  | 1.30              | 0.52                         | 1.97      | 3117  |
| TAG   | *               | 0.07                  | 0.25      | 6   | 0.49              | 0.10     | 0.57      | 24   | 1.11              | 0.10     | 0.38      | 36   | 0.74              | 0.13                         | 0.51      | 811   |
| TGA   | *               | 0.24                  | 0.93      | 22  | 0.70              | 0.32     | 1.85      | 78   | 1.39              | 0.25     | 0.97      | 92   | 0.73              | 0.35                         | 1.34      | 2108  |
| TAA   | *               | 0.70                  | 2.75      | 65  | -                 | -        | -         | -    | -                 | -        | -         | -    | -                 | -                            | -         | -     |
| TAG   | *               | 0.07                  | 0.25      | 6   | -                 | -        | -         | -    | -                 | -        | -         | -    | -                 | -                            | -         | -     |
| TGA   | *               | 0.24                  | 0.93      | 22  | -                 | -        | -         | -    | -                 | -        | -         | -    | -                 | -                            | -         | -     |

<sup>a</sup> AA, amino acid

<sup>b</sup> Fraction, proportion of usage of the codon among the set of codons which code for this codon's amino acid; Frequency, number of specific codon divided by total number of codons in the sequence; No, total number of times the specific codon is observed in the sequence.

<sup>c</sup> \*, stop codon

## References

1. Chaikerasitak, V., Nguyen, K., Egan, M. E., Erb, M. L., Vavilina, A. and Pogliano, J. 2017, The phage nucleus and tubulin spindle are conserved among large pseudomonas phages. *Cell Rep.*, **20**, 1563-1571.
2. Malone, L. M., Warring, S. L., Jackson, S. A., et al. 2020, A jumbo phage that forms a nucleus-like structure evades CRISPR–Cas DNA targeting but is vulnerable to type III RNA-based immunity. *Nat. Microbiol.*, **5**, 48-55.
